# Supplementary material for: Altered hippocampal-prefrontal communication during anxiety-related avoidance in mice deficient for the autism-associated gene Pogz
Source: eLife. 2020 Nov 6;9:e54835. doi: 10.7554/eLife.54835 (PMC7682992; doi:10.7554/eLife.54835)
Supplement: Figure 2—source data 1. [file elife-54835-fig2-data1.csv]

	Animal	Genotype	Assay	Zone	Frequency	Measure	Value
0	4796	WT	EPM	Closed Arm	Theta	Avg Log Power	12.183
1	4797	WT	EPM	Closed Arm	Theta	Avg Log Power	10.661
2	4967	WT	EPM	Closed Arm	Theta	Avg Log Power	11.832
3	861	WT	EPM	Closed Arm	Theta	Avg Log Power	12.665999999999999
4	4633	WT	EPM	Closed Arm	Theta	Avg Log Power	11.763
5	4639	WT	EPM	Closed Arm	Theta	Avg Log Power	13.239
6	4796	WT	EPM	Open Arm	Theta	Avg Log Power	12.79
7	4797	WT	EPM	Open Arm	Theta	Avg Log Power	10.720999999999998
8	4967	WT	EPM	Open Arm	Theta	Avg Log Power	11.429
9	861	WT	EPM	Open Arm	Theta	Avg Log Power	12.269
10	4633	WT	EPM	Open Arm	Theta	Avg Log Power	11.578
11	4639	WT	EPM	Open Arm	Theta	Avg Log Power	13.232999999999999
12	4796	WT	EPM	Closed Arm	Beta	Avg Log Power	11.064
13	4797	WT	EPM	Closed Arm	Beta	Avg Log Power	10.031
14	4967	WT	EPM	Closed Arm	Beta	Avg Log Power	11.311
15	861	WT	EPM	Closed Arm	Beta	Avg Log Power	11.537
16	4633	WT	EPM	Closed Arm	Beta	Avg Log Power	10.952
17	4639	WT	EPM	Closed Arm	Beta	Avg Log Power	11.915
18	4796	WT	EPM	Open Arm	Beta	Avg Log Power	11.01
19	4797	WT	EPM	Open Arm	Beta	Avg Log Power	10.556
20	4967	WT	EPM	Open Arm	Beta	Avg Log Power	11.167
21	861	WT	EPM	Open Arm	Beta	Avg Log Power	11.421
22	4633	WT	EPM	Open Arm	Beta	Avg Log Power	10.988
23	4639	WT	EPM	Open Arm	Beta	Avg Log Power	11.837
24	4796	WT	EPM	Closed Arm	Low Gamma	Avg Log Power	10.634
25	4797	WT	EPM	Closed Arm	Low Gamma	Avg Log Power	10.227
26	4967	WT	EPM	Closed Arm	Low Gamma	Avg Log Power	10.57
27	861	WT	EPM	Closed Arm	Low Gamma	Avg Log Power	11.261
28	4633	WT	EPM	Closed Arm	Low Gamma	Avg Log Power	11.037
29	4639	WT	EPM	Closed Arm	Low Gamma	Avg Log Power	11.454
30	4796	WT	EPM	Open Arm	Low Gamma	Avg Log Power	10.907
31	4797	WT	EPM	Open Arm	Low Gamma	Avg Log Power	10.102
32	4967	WT	EPM	Open Arm	Low Gamma	Avg Log Power	10.309000000000001
33	861	WT	EPM	Open Arm	Low Gamma	Avg Log Power	11.338
34	4633	WT	EPM	Open Arm	Low Gamma	Avg Log Power	11.054
35	4639	WT	EPM	Open Arm	Low Gamma	Avg Log Power	11.302999999999999
36	4796	WT	EPM	Closed Arm	High Gamma	Avg Log Power	11.604000000000001
37	4797	WT	EPM	Closed Arm	High Gamma	Avg Log Power	10.501
38	4967	WT	EPM	Closed Arm	High Gamma	Avg Log Power	10.5
39	861	WT	EPM	Closed Arm	High Gamma	Avg Log Power	10.623
40	4633	WT	EPM	Closed Arm	High Gamma	Avg Log Power	10.552999999999999
41	4639	WT	EPM	Closed Arm	High Gamma	Avg Log Power	10.698
42	4796	WT	EPM	Open Arm	High Gamma	Avg Log Power	11.66
43	4797	WT	EPM	Open Arm	High Gamma	Avg Log Power	10.19
44	4967	WT	EPM	Open Arm	High Gamma	Avg Log Power	10.226
45	861	WT	EPM	Open Arm	High Gamma	Avg Log Power	10.624
46	4633	WT	EPM	Open Arm	High Gamma	Avg Log Power	10.517999999999999
47	4639	WT	EPM	Open Arm	High Gamma	Avg Log Power	10.627
48	4796	WT	EPM	Closed Arm	Theta	Avg Log Power	12.171
49	4797	WT	EPM	Closed Arm	Theta	Avg Log Power	10.812000000000001
50	4967	WT	EPM	Closed Arm	Theta	Avg Log Power	11.876
51	861	WT	EPM	Closed Arm	Theta	Avg Log Power	13.515999999999998
52	4633	WT	EPM	Closed Arm	Theta	Avg Log Power	12.629000000000001
53	4639	WT	EPM	Closed Arm	Theta	Avg Log Power	12.583
54	4796	WT	EPM	Open Arm	Theta	Avg Log Power	12.714
55	4797	WT	EPM	Open Arm	Theta	Avg Log Power	11.216
56	4967	WT	EPM	Open Arm	Theta	Avg Log Power	11.429
57	861	WT	EPM	Open Arm	Theta	Avg Log Power	11.969000000000001
58	4633	WT	EPM	Open Arm	Theta	Avg Log Power	12.644
59	4639	WT	EPM	Open Arm	Theta	Avg Log Power	12.75
60	4796	WT	EPM	Closed Arm	Beta	Avg Log Power	11.623
61	4797	WT	EPM	Closed Arm	Beta	Avg Log Power	10.682
62	4967	WT	EPM	Closed Arm	Beta	Avg Log Power	11.412
63	861	WT	EPM	Closed Arm	Beta	Avg Log Power	12.052
64	4633	WT	EPM	Closed Arm	Beta	Avg Log Power	11.369000000000002
65	4639	WT	EPM	Closed Arm	Beta	Avg Log Power	11.715
66	4796	WT	EPM	Open Arm	Beta	Avg Log Power	11.565999999999999
67	4797	WT	EPM	Open Arm	Beta	Avg Log Power	11.050999999999998
68	4967	WT	EPM	Open Arm	Beta	Avg Log Power	11.277999999999999
69	861	WT	EPM	Open Arm	Beta	Avg Log Power	11.427999999999999
70	4633	WT	EPM	Open Arm	Beta	Avg Log Power	11.418
71	4639	WT	EPM	Open Arm	Beta	Avg Log Power	11.74
72	4796	WT	EPM	Closed Arm	Low Gamma	Avg Log Power	11.514000000000001
73	4797	WT	EPM	Closed Arm	Low Gamma	Avg Log Power	11.35
74	4967	WT	EPM	Closed Arm	Low Gamma	Avg Log Power	10.718
75	861	WT	EPM	Closed Arm	Low Gamma	Avg Log Power	11.133
76	4633	WT	EPM	Closed Arm	Low Gamma	Avg Log Power	11.234000000000002
77	4639	WT	EPM	Closed Arm	Low Gamma	Avg Log Power	11.267999999999999
78	4796	WT	EPM	Open Arm	Low Gamma	Avg Log Power	11.949000000000002
79	4797	WT	EPM	Open Arm	Low Gamma	Avg Log Power	11.786
80	4967	WT	EPM	Open Arm	Low Gamma	Avg Log Power	10.249
81	861	WT	EPM	Open Arm	Low Gamma	Avg Log Power	10.991
82	4633	WT	EPM	Open Arm	Low Gamma	Avg Log Power	11.183
83	4639	WT	EPM	Open Arm	Low Gamma	Avg Log Power	11.165999999999999
84	4796	WT	EPM	Closed Arm	High Gamma	Avg Log Power	11.782
85	4797	WT	EPM	Closed Arm	High Gamma	Avg Log Power	11.082
86	4967	WT	EPM	Closed Arm	High Gamma	Avg Log Power	10.41
87	861	WT	EPM	Closed Arm	High Gamma	Avg Log Power	10.925999999999998
88	4633	WT	EPM	Closed Arm	High Gamma	Avg Log Power	10.885
89	4639	WT	EPM	Closed Arm	High Gamma	Avg Log Power	10.444
90	4796	WT	EPM	Open Arm	High Gamma	Avg Log Power	11.837
91	4797	WT	EPM	Open Arm	High Gamma	Avg Log Power	11.413
92	4967	WT	EPM	Open Arm	High Gamma	Avg Log Power	9.9968
93	861	WT	EPM	Open Arm	High Gamma	Avg Log Power	10.700999999999999
94	4633	WT	EPM	Open Arm	High Gamma	Avg Log Power	10.860999999999999
95	4639	WT	EPM	Open Arm	High Gamma	Avg Log Power	10.363
96	4796	WT	EPM	Closed Arm	Theta	WPLI	0.042814
97	4796	WT	EPM	Open Arm	Theta	WPLI	0.45206
98	4797	WT	EPM	Closed Arm	Theta	WPLI	-0.11717000000000001
99	4797	WT	EPM	Open Arm	Theta	WPLI	-0.3603
100	4967	WT	EPM	Closed Arm	Theta	WPLI	-0.0031840999999999996
101	4967	WT	EPM	Open Arm	Theta	WPLI	0.29088
102	861	WT	EPM	Closed Arm	Theta	WPLI	-0.0040135
103	861	WT	EPM	Open Arm	Theta	WPLI	0.033138
104	4633	WT	EPM	Closed Arm	Theta	WPLI	0.019057
105	4633	WT	EPM	Open Arm	Theta	WPLI	0.1198
106	4639	WT	EPM	Closed Arm	Theta	WPLI	0.017913
107	4639	WT	EPM	Open Arm	Theta	WPLI	0.069299
108	4796	WT	EPM	Closed Arm	Beta	WPLI	0.028600999999999998
109	4796	WT	EPM	Open Arm	Beta	WPLI	0.44671000000000005
110	4797	WT	EPM	Closed Arm	Beta	WPLI	-0.058789
111	4797	WT	EPM	Open Arm	Beta	WPLI	-0.31331
112	4967	WT	EPM	Closed Arm	Beta	WPLI	-0.0024425000000000002
113	4967	WT	EPM	Open Arm	Beta	WPLI	0.10165
114	861	WT	EPM	Closed Arm	Beta	WPLI	0.0021434
115	861	WT	EPM	Open Arm	Beta	WPLI	0.0029575
116	4633	WT	EPM	Closed Arm	Beta	WPLI	0.0075921999999999995
117	4633	WT	EPM	Open Arm	Beta	WPLI	0.073991
118	4639	WT	EPM	Closed Arm	Beta	WPLI	0.0088172
119	4639	WT	EPM	Open Arm	Beta	WPLI	0.0032455999999999995
120	4796	WT	EPM	Closed Arm	Low Gamma	WPLI	0.021825999999999998
121	4796	WT	EPM	Open Arm	Low Gamma	WPLI	0.12719
122	4797	WT	EPM	Closed Arm	Low Gamma	WPLI	-0.039553
123	4797	WT	EPM	Open Arm	Low Gamma	WPLI	-0.29569
124	4967	WT	EPM	Closed Arm	Low Gamma	WPLI	-0.01048
125	4967	WT	EPM	Open Arm	Low Gamma	WPLI	-0.25295
126	861	WT	EPM	Closed Arm	Low Gamma	WPLI	0.005382100000000001
127	861	WT	EPM	Open Arm	Low Gamma	WPLI	0.0029541999999999997
128	4633	WT	EPM	Closed Arm	Low Gamma	WPLI	-0.0010881999999999999
129	4633	WT	EPM	Open Arm	Low Gamma	WPLI	0.041786000000000004
130	4639	WT	EPM	Closed Arm	Low Gamma	WPLI	-0.0025303
131	4639	WT	EPM	Open Arm	Low Gamma	WPLI	0.0025535999999999996
132	4796	WT	EPM	Closed Arm	High Gamma	WPLI	0.02647
133	4796	WT	EPM	Open Arm	High Gamma	WPLI	0.32803000000000004
134	4797	WT	EPM	Closed Arm	High Gamma	WPLI	0.024724
135	4797	WT	EPM	Open Arm	High Gamma	WPLI	0.092757
136	4967	WT	EPM	Closed Arm	High Gamma	WPLI	-0.015766
137	4967	WT	EPM	Open Arm	High Gamma	WPLI	-0.018212
138	861	WT	EPM	Closed Arm	High Gamma	WPLI	0.00052998
139	861	WT	EPM	Open Arm	High Gamma	WPLI	0.0035294000000000002
140	4633	WT	EPM	Closed Arm	High Gamma	WPLI	0.0031016999999999998
141	4633	WT	EPM	Open Arm	High Gamma	WPLI	0.0025631
142	4639	WT	EPM	Closed Arm	High Gamma	WPLI	-0.0018375
143	4639	WT	EPM	Open Arm	High Gamma	WPLI	0.017509
144	4237	Het	EPM	Closed Arm	Theta	Avg Log Power	13.394
145	4580	Het	EPM	Closed Arm	Theta	Avg Log Power	13.905999999999999
146	4968	Het	EPM	Closed Arm	Theta	Avg Log Power	12.690999999999999
147	4973	Het	EPM	Closed Arm	Theta	Avg Log Power	13.013
148	858	Het	EPM	Closed Arm	Theta	Avg Log Power	12.9
149	860	Het	EPM	Closed Arm	Theta	Avg Log Power	11.536
150	4638	Het	EPM	Closed Arm	Theta	Avg Log Power	11.585999999999999
151	4237	Het	EPM	Open Arm	Theta	Avg Log Power	13.110999999999999
152	4580	Het	EPM	Open Arm	Theta	Avg Log Power	14.181
153	4968	Het	EPM	Open Arm	Theta	Avg Log Power	12.262
154	4973	Het	EPM	Open Arm	Theta	Avg Log Power	13.232000000000001
155	858	Het	EPM	Open Arm	Theta	Avg Log Power	12.925999999999998
156	860	Het	EPM	Open Arm	Theta	Avg Log Power	11.127
157	4638	Het	EPM	Open Arm	Theta	Avg Log Power	11.625
158	4237	Het	EPM	Closed Arm	Beta	Avg Log Power	12.370999999999999
159	4580	Het	EPM	Closed Arm	Beta	Avg Log Power	12.708
160	4968	Het	EPM	Closed Arm	Beta	Avg Log Power	12.013
161	4973	Het	EPM	Closed Arm	Beta	Avg Log Power	11.749
162	858	Het	EPM	Closed Arm	Beta	Avg Log Power	12.616
163	860	Het	EPM	Closed Arm	Beta	Avg Log Power	10.581
164	4638	Het	EPM	Closed Arm	Beta	Avg Log Power	10.364
165	4237	Het	EPM	Open Arm	Beta	Avg Log Power	12.349
166	4580	Het	EPM	Open Arm	Beta	Avg Log Power	12.915
167	4968	Het	EPM	Open Arm	Beta	Avg Log Power	11.939
168	4973	Het	EPM	Open Arm	Beta	Avg Log Power	12.272
169	858	Het	EPM	Open Arm	Beta	Avg Log Power	12.419
170	860	Het	EPM	Open Arm	Beta	Avg Log Power	10.409
171	4638	Het	EPM	Open Arm	Beta	Avg Log Power	10.164
172	4237	Het	EPM	Closed Arm	Low Gamma	Avg Log Power	11.806
173	4580	Het	EPM	Closed Arm	Low Gamma	Avg Log Power	11.988
174	4968	Het	EPM	Closed Arm	Low Gamma	Avg Log Power	11.209000000000001
175	4973	Het	EPM	Closed Arm	Low Gamma	Avg Log Power	10.999
176	858	Het	EPM	Closed Arm	Low Gamma	Avg Log Power	12.546
177	860	Het	EPM	Closed Arm	Low Gamma	Avg Log Power	10.231
178	4638	Het	EPM	Closed Arm	Low Gamma	Avg Log Power	10.169
179	4237	Het	EPM	Open Arm	Low Gamma	Avg Log Power	12.360999999999999
180	4580	Het	EPM	Open Arm	Low Gamma	Avg Log Power	12.04
181	4968	Het	EPM	Open Arm	Low Gamma	Avg Log Power	11.219000000000001
182	4973	Het	EPM	Open Arm	Low Gamma	Avg Log Power	11.299000000000001
183	858	Het	EPM	Open Arm	Low Gamma	Avg Log Power	12.62
184	860	Het	EPM	Open Arm	Low Gamma	Avg Log Power	10.398
185	4638	Het	EPM	Open Arm	Low Gamma	Avg Log Power	10.187999999999999
186	4237	Het	EPM	Closed Arm	High Gamma	Avg Log Power	10.767999999999999
187	4580	Het	EPM	Closed Arm	High Gamma	Avg Log Power	10.757
188	4968	Het	EPM	Closed Arm	High Gamma	Avg Log Power	10.734000000000002
189	4973	Het	EPM	Closed Arm	High Gamma	Avg Log Power	10.229
190	858	Het	EPM	Closed Arm	High Gamma	Avg Log Power	11.46
191	860	Het	EPM	Closed Arm	High Gamma	Avg Log Power	10.105
192	4638	Het	EPM	Closed Arm	High Gamma	Avg Log Power	9.8235
193	4237	Het	EPM	Open Arm	High Gamma	Avg Log Power	11.071
194	4580	Het	EPM	Open Arm	High Gamma	Avg Log Power	10.729000000000001
195	4968	Het	EPM	Open Arm	High Gamma	Avg Log Power	10.56
196	4973	Het	EPM	Open Arm	High Gamma	Avg Log Power	10.273
197	858	Het	EPM	Open Arm	High Gamma	Avg Log Power	11.662
198	860	Het	EPM	Open Arm	High Gamma	Avg Log Power	9.9758
199	4638	Het	EPM	Open Arm	High Gamma	Avg Log Power	9.9048
200	4237	Het	EPM	Closed Arm	Theta	Avg Log Power	12.87
201	4580	Het	EPM	Closed Arm	Theta	Avg Log Power	12.905999999999999
202	4968	Het	EPM	Closed Arm	Theta	Avg Log Power	12.89
203	4973	Het	EPM	Closed Arm	Theta	Avg Log Power	12.26
204	858	Het	EPM	Closed Arm	Theta	Avg Log Power	11.685
205	860	Het	EPM	Closed Arm	Theta	Avg Log Power	11.632
206	4638	Het	EPM	Closed Arm	Theta	Avg Log Power	12.06
207	4237	Het	EPM	Open Arm	Theta	Avg Log Power	12.450999999999999
208	4580	Het	EPM	Open Arm	Theta	Avg Log Power	13.057
209	4968	Het	EPM	Open Arm	Theta	Avg Log Power	13.33
210	4973	Het	EPM	Open Arm	Theta	Avg Log Power	12.244000000000002
211	858	Het	EPM	Open Arm	Theta	Avg Log Power	11.468
212	860	Het	EPM	Open Arm	Theta	Avg Log Power	11.175
213	4638	Het	EPM	Open Arm	Theta	Avg Log Power	11.734000000000002
214	4237	Het	EPM	Closed Arm	Beta	Avg Log Power	11.557
215	4580	Het	EPM	Closed Arm	Beta	Avg Log Power	11.843
216	4968	Het	EPM	Closed Arm	Beta	Avg Log Power	12.558
217	4973	Het	EPM	Closed Arm	Beta	Avg Log Power	11.639000000000001
218	858	Het	EPM	Closed Arm	Beta	Avg Log Power	10.895999999999999
219	860	Het	EPM	Closed Arm	Beta	Avg Log Power	10.722000000000001
220	4638	Het	EPM	Closed Arm	Beta	Avg Log Power	11.219000000000001
221	4237	Het	EPM	Open Arm	Beta	Avg Log Power	11.508
222	4580	Het	EPM	Open Arm	Beta	Avg Log Power	11.808
223	4968	Het	EPM	Open Arm	Beta	Avg Log Power	12.842
224	4973	Het	EPM	Open Arm	Beta	Avg Log Power	11.843
225	858	Het	EPM	Open Arm	Beta	Avg Log Power	10.779000000000002
226	860	Het	EPM	Open Arm	Beta	Avg Log Power	10.514000000000001
227	4638	Het	EPM	Open Arm	Beta	Avg Log Power	10.917
228	4237	Het	EPM	Closed Arm	Low Gamma	Avg Log Power	11.022
229	4580	Het	EPM	Closed Arm	Low Gamma	Avg Log Power	11.253
230	4968	Het	EPM	Closed Arm	Low Gamma	Avg Log Power	11.683
231	4973	Het	EPM	Closed Arm	Low Gamma	Avg Log Power	10.960999999999999
232	858	Het	EPM	Closed Arm	Low Gamma	Avg Log Power	10.527000000000001
233	860	Het	EPM	Closed Arm	Low Gamma	Avg Log Power	10.49
234	4638	Het	EPM	Closed Arm	Low Gamma	Avg Log Power	11.045
235	4237	Het	EPM	Open Arm	Low Gamma	Avg Log Power	11.48
236	4580	Het	EPM	Open Arm	Low Gamma	Avg Log Power	11.228
237	4968	Het	EPM	Open Arm	Low Gamma	Avg Log Power	12.019
238	4973	Het	EPM	Open Arm	Low Gamma	Avg Log Power	11.193
239	858	Het	EPM	Open Arm	Low Gamma	Avg Log Power	10.578
240	860	Het	EPM	Open Arm	Low Gamma	Avg Log Power	10.597000000000001
241	4638	Het	EPM	Open Arm	Low Gamma	Avg Log Power	10.953
242	4237	Het	EPM	Closed Arm	High Gamma	Avg Log Power	9.869
243	4580	Het	EPM	Closed Arm	High Gamma	Avg Log Power	10.286
244	4968	Het	EPM	Closed Arm	High Gamma	Avg Log Power	10.953
245	4973	Het	EPM	Closed Arm	High Gamma	Avg Log Power	10.66
246	858	Het	EPM	Closed Arm	High Gamma	Avg Log Power	10.444
247	860	Het	EPM	Closed Arm	High Gamma	Avg Log Power	10.196
248	4638	Het	EPM	Closed Arm	High Gamma	Avg Log Power	10.527000000000001
249	4237	Het	EPM	Open Arm	High Gamma	Avg Log Power	10.006
250	4580	Het	EPM	Open Arm	High Gamma	Avg Log Power	10.262
251	4968	Het	EPM	Open Arm	High Gamma	Avg Log Power	10.849
252	4973	Het	EPM	Open Arm	High Gamma	Avg Log Power	10.39
253	858	Het	EPM	Open Arm	High Gamma	Avg Log Power	10.37
254	860	Het	EPM	Open Arm	High Gamma	Avg Log Power	9.97
255	4638	Het	EPM	Open Arm	High Gamma	Avg Log Power	10.455
256	4237	Het	EPM	Closed Arm	Theta	WPLI	0.033823
257	4237	Het	EPM	Open Arm	Theta	WPLI	0.057515
258	4580	Het	EPM	Closed Arm	Theta	WPLI	-0.0067948999999999996
259	4580	Het	EPM	Open Arm	Theta	WPLI	0.02203
260	4968	Het	EPM	Closed Arm	Theta	WPLI	0.0029792
261	4968	Het	EPM	Open Arm	Theta	WPLI	0.11155999999999999
262	4973	Het	EPM	Closed Arm	Theta	WPLI	0.016547
263	4973	Het	EPM	Open Arm	Theta	WPLI	0.13633
264	858	Het	EPM	Closed Arm	Theta	WPLI	-0.02132
265	858	Het	EPM	Open Arm	Theta	WPLI	0.14602
266	860	Het	EPM	Closed Arm	Theta	WPLI	0.011994
267	860	Het	EPM	Open Arm	Theta	WPLI	0.010939
268	4638	Het	EPM	Closed Arm	Theta	WPLI	0.011343
269	4638	Het	EPM	Open Arm	Theta	WPLI	0.022188
270	4237	Het	EPM	Closed Arm	Beta	WPLI	0.023275999999999998
271	4237	Het	EPM	Open Arm	Beta	WPLI	0.10745999999999999
272	4580	Het	EPM	Closed Arm	Beta	WPLI	0.026558999999999996
273	4580	Het	EPM	Open Arm	Beta	WPLI	0.093395
274	4968	Het	EPM	Closed Arm	Beta	WPLI	-0.030612
275	4968	Het	EPM	Open Arm	Beta	WPLI	0.093928
276	4973	Het	EPM	Closed Arm	Beta	WPLI	-0.0027212
277	4973	Het	EPM	Open Arm	Beta	WPLI	0.069887
278	858	Het	EPM	Closed Arm	Beta	WPLI	-0.0089476
279	858	Het	EPM	Open Arm	Beta	WPLI	0.026882
280	860	Het	EPM	Closed Arm	Beta	WPLI	0.016691
281	860	Het	EPM	Open Arm	Beta	WPLI	-0.027392000000000003
282	4638	Het	EPM	Closed Arm	Beta	WPLI	-0.0091335
283	4638	Het	EPM	Open Arm	Beta	WPLI	0.028717000000000003
284	4237	Het	EPM	Closed Arm	Low Gamma	WPLI	0.006586399999999999
285	4237	Het	EPM	Open Arm	Low Gamma	WPLI	0.043522000000000005
286	4580	Het	EPM	Closed Arm	Low Gamma	WPLI	-0.0057462
287	4580	Het	EPM	Open Arm	Low Gamma	WPLI	0.041366
288	4968	Het	EPM	Closed Arm	Low Gamma	WPLI	-0.055175
289	4968	Het	EPM	Open Arm	Low Gamma	WPLI	-0.096243
290	4973	Het	EPM	Closed Arm	Low Gamma	WPLI	-0.0028605999999999996
291	4973	Het	EPM	Open Arm	Low Gamma	WPLI	0.059763
292	858	Het	EPM	Closed Arm	Low Gamma	WPLI	0.0030945
293	858	Het	EPM	Open Arm	Low Gamma	WPLI	0.057488
294	860	Het	EPM	Closed Arm	Low Gamma	WPLI	0.0085556
295	860	Het	EPM	Open Arm	Low Gamma	WPLI	0.0073138000000000005
296	4638	Het	EPM	Closed Arm	Low Gamma	WPLI	-0.0018926
297	4638	Het	EPM	Open Arm	Low Gamma	WPLI	0.018963
298	4237	Het	EPM	Closed Arm	High Gamma	WPLI	0.0073541
299	4237	Het	EPM	Open Arm	High Gamma	WPLI	0.021384
300	4580	Het	EPM	Closed Arm	High Gamma	WPLI	-0.0058984
301	4580	Het	EPM	Open Arm	High Gamma	WPLI	-0.00058827
302	4968	Het	EPM	Closed Arm	High Gamma	WPLI	-0.058335000000000005
303	4968	Het	EPM	Open Arm	High Gamma	WPLI	0.10069
304	4973	Het	EPM	Closed Arm	High Gamma	WPLI	-0.0017602999999999998
305	4973	Het	EPM	Open Arm	High Gamma	WPLI	-0.013368000000000001
306	858	Het	EPM	Closed Arm	High Gamma	WPLI	0.0040650999999999994
307	858	Het	EPM	Open Arm	High Gamma	WPLI	-0.028227
308	860	Het	EPM	Closed Arm	High Gamma	WPLI	0.0032657
309	860	Het	EPM	Open Arm	High Gamma	WPLI	0.027232999999999997
310	4638	Het	EPM	Closed Arm	High Gamma	WPLI	-0.0041713
311	4638	Het	EPM	Open Arm	High Gamma	WPLI	-0.012364
312	4796	WT	Homecage	NA	Theta	Avg Log Power	11.669
313	4797	WT	Homecage	NA	Theta	Avg Log Power	10.947000000000001
314	4967	WT	Homecage	NA	Theta	Avg Log Power	11.671
315	861	WT	Homecage	NA	Theta	Avg Log Power	12.279000000000002
316	4633	WT	Homecage	NA	Theta	Avg Log Power	11.705
317	4639	WT	Homecage	NA	Theta	Avg Log Power	13.068
318	4796	WT	Homecage	NA	Beta	Avg Log Power	10.985
319	4797	WT	Homecage	NA	Beta	Avg Log Power	10.304
320	4967	WT	Homecage	NA	Beta	Avg Log Power	11.175
321	861	WT	Homecage	NA	Beta	Avg Log Power	11.360999999999999
322	4633	WT	Homecage	NA	Beta	Avg Log Power	10.842
323	4639	WT	Homecage	NA	Beta	Avg Log Power	11.777000000000001
324	4796	WT	Homecage	NA	Low Gamma	Avg Log Power	10.969000000000001
325	4797	WT	Homecage	NA	Low Gamma	Avg Log Power	10.530999999999999
326	4967	WT	Homecage	NA	Low Gamma	Avg Log Power	11.015999999999998
327	861	WT	Homecage	NA	Low Gamma	Avg Log Power	11.347000000000001
328	4633	WT	Homecage	NA	Low Gamma	Avg Log Power	11.325
329	4639	WT	Homecage	NA	Low Gamma	Avg Log Power	11.446
330	4796	WT	Homecage	NA	High Gamma	Avg Log Power	11.547
331	4797	WT	Homecage	NA	High Gamma	Avg Log Power	11.114
332	4967	WT	Homecage	NA	High Gamma	Avg Log Power	10.542
333	861	WT	Homecage	NA	High Gamma	Avg Log Power	11.245999999999999
334	4633	WT	Homecage	NA	High Gamma	Avg Log Power	10.277000000000001
335	4639	WT	Homecage	NA	High Gamma	Avg Log Power	10.825999999999999
336	4796	WT	Homecage	NA	Theta	Avg Log Power	11.649000000000001
337	4797	WT	Homecage	NA	Theta	Avg Log Power	11.302
338	4967	WT	Homecage	NA	Theta	Avg Log Power	11.655
339	861	WT	Homecage	NA	Theta	Avg Log Power	12.074000000000002
340	4633	WT	Homecage	NA	Theta	Avg Log Power	12.497
341	4639	WT	Homecage	NA	Theta	Avg Log Power	12.705
342	4796	WT	Homecage	NA	Beta	Avg Log Power	11.442
343	4797	WT	Homecage	NA	Beta	Avg Log Power	10.873
344	4967	WT	Homecage	NA	Beta	Avg Log Power	11.265999999999998
345	861	WT	Homecage	NA	Beta	Avg Log Power	11.132
346	4633	WT	Homecage	NA	Beta	Avg Log Power	11.227
347	4639	WT	Homecage	NA	Beta	Avg Log Power	11.784
348	4796	WT	Homecage	NA	Low Gamma	Avg Log Power	11.58
349	4797	WT	Homecage	NA	Low Gamma	Avg Log Power	11.5
350	4967	WT	Homecage	NA	Low Gamma	Avg Log Power	11.258
351	861	WT	Homecage	NA	Low Gamma	Avg Log Power	11.092
352	4633	WT	Homecage	NA	Low Gamma	Avg Log Power	11.463
353	4639	WT	Homecage	NA	Low Gamma	Avg Log Power	11.454
354	4796	WT	Homecage	NA	High Gamma	Avg Log Power	11.375
355	4797	WT	Homecage	NA	High Gamma	Avg Log Power	11.383
356	4967	WT	Homecage	NA	High Gamma	Avg Log Power	10.559000000000001
357	861	WT	Homecage	NA	High Gamma	Avg Log Power	11.561
358	4633	WT	Homecage	NA	High Gamma	Avg Log Power	10.625
359	4639	WT	Homecage	NA	High Gamma	Avg Log Power	10.594000000000001
360	4796	WT	Homecage	NA	Theta	WPLI	0.36067
361	4797	WT	Homecage	NA	Theta	WPLI	-0.62046
362	4967	WT	Homecage	NA	Theta	WPLI	0.29369
363	861	WT	Homecage	NA	Theta	WPLI	0.47063
364	4633	WT	Homecage	NA	Theta	WPLI	0.6442100000000001
365	4639	WT	Homecage	NA	Theta	WPLI	0.60019
366	4796	WT	Homecage	NA	Beta	WPLI	0.34302
367	4797	WT	Homecage	NA	Beta	WPLI	0.049706
368	4967	WT	Homecage	NA	Beta	WPLI	0.05400800000000001
369	861	WT	Homecage	NA	Beta	WPLI	0.14642
370	4633	WT	Homecage	NA	Beta	WPLI	0.02622
371	4639	WT	Homecage	NA	Beta	WPLI	0.18905999999999998
372	4796	WT	Homecage	NA	Low Gamma	WPLI	0.28558
373	4797	WT	Homecage	NA	Low Gamma	WPLI	-0.34936
374	4967	WT	Homecage	NA	Low Gamma	WPLI	0.39397
375	861	WT	Homecage	NA	Low Gamma	WPLI	0.14182999999999998
376	4633	WT	Homecage	NA	Low Gamma	WPLI	-0.11656
377	4639	WT	Homecage	NA	Low Gamma	WPLI	-0.06237
378	4796	WT	Homecage	NA	High Gamma	WPLI	0.38893
379	4797	WT	Homecage	NA	High Gamma	WPLI	0.1976
380	4967	WT	Homecage	NA	High Gamma	WPLI	0.46579
381	861	WT	Homecage	NA	High Gamma	WPLI	0.067853
382	4633	WT	Homecage	NA	High Gamma	WPLI	0.043121
383	4639	WT	Homecage	NA	High Gamma	WPLI	-0.075196
384	4237	Het	Homecage	NA	Theta	Avg Log Power	13.102
385	4580	Het	Homecage	NA	Theta	Avg Log Power	13.943
386	4968	Het	Homecage	NA	Theta	Avg Log Power	12.118
387	4973	Het	Homecage	NA	Theta	Avg Log Power	12.975999999999999
388	858	Het	Homecage	NA	Theta	Avg Log Power	12.208
389	4638	Het	Homecage	NA	Theta	Avg Log Power	11.664000000000001
390	4237	Het	Homecage	NA	Beta	Avg Log Power	12.373
391	4580	Het	Homecage	NA	Beta	Avg Log Power	13.005
392	4968	Het	Homecage	NA	Beta	Avg Log Power	11.685
393	4973	Het	Homecage	NA	Beta	Avg Log Power	11.453
394	858	Het	Homecage	NA	Beta	Avg Log Power	12.333
395	4638	Het	Homecage	NA	Beta	Avg Log Power	10.425
396	4237	Het	Homecage	NA	Low Gamma	Avg Log Power	12.485999999999999
397	4580	Het	Homecage	NA	Low Gamma	Avg Log Power	12.347000000000001
398	4968	Het	Homecage	NA	Low Gamma	Avg Log Power	11.725999999999999
399	4973	Het	Homecage	NA	Low Gamma	Avg Log Power	11.05
400	858	Het	Homecage	NA	Low Gamma	Avg Log Power	12.59
401	4638	Het	Homecage	NA	Low Gamma	Avg Log Power	10.325999999999999
402	4237	Het	Homecage	NA	High Gamma	Avg Log Power	11.950999999999999
403	4580	Het	Homecage	NA	High Gamma	Avg Log Power	11.09
404	4968	Het	Homecage	NA	High Gamma	Avg Log Power	11.045
405	4973	Het	Homecage	NA	High Gamma	Avg Log Power	10.443
406	858	Het	Homecage	NA	High Gamma	Avg Log Power	11.385
407	4638	Het	Homecage	NA	High Gamma	Avg Log Power	9.8116
408	4237	Het	Homecage	NA	Theta	Avg Log Power	12.889000000000001
409	4580	Het	Homecage	NA	Theta	Avg Log Power	12.932
410	4968	Het	Homecage	NA	Theta	Avg Log Power	12.16
411	4973	Het	Homecage	NA	Theta	Avg Log Power	11.62
412	858	Het	Homecage	NA	Theta	Avg Log Power	11.216
413	4638	Het	Homecage	NA	Theta	Avg Log Power	11.692
414	4237	Het	Homecage	NA	Beta	Avg Log Power	11.765999999999998
415	4580	Het	Homecage	NA	Beta	Avg Log Power	12.058
416	4968	Het	Homecage	NA	Beta	Avg Log Power	11.707
417	4973	Het	Homecage	NA	Beta	Avg Log Power	10.878
418	858	Het	Homecage	NA	Beta	Avg Log Power	10.511
419	4638	Het	Homecage	NA	Beta	Avg Log Power	11.107999999999999
420	4237	Het	Homecage	NA	Low Gamma	Avg Log Power	11.876
421	4580	Het	Homecage	NA	Low Gamma	Avg Log Power	11.649000000000001
422	4968	Het	Homecage	NA	Low Gamma	Avg Log Power	11.737
423	4973	Het	Homecage	NA	Low Gamma	Avg Log Power	10.824000000000002
424	858	Het	Homecage	NA	Low Gamma	Avg Log Power	10.77
425	4638	Het	Homecage	NA	Low Gamma	Avg Log Power	11.527999999999999
426	4237	Het	Homecage	NA	High Gamma	Avg Log Power	11.899000000000001
427	4580	Het	Homecage	NA	High Gamma	Avg Log Power	10.612
428	4968	Het	Homecage	NA	High Gamma	Avg Log Power	11.040999999999999
429	4973	Het	Homecage	NA	High Gamma	Avg Log Power	10.842
430	858	Het	Homecage	NA	High Gamma	Avg Log Power	10.662
431	4638	Het	Homecage	NA	High Gamma	Avg Log Power	10.642000000000001
432	4237	Het	Homecage	NA	Theta	WPLI	0.35135
433	4580	Het	Homecage	NA	Theta	WPLI	-0.315
434	4968	Het	Homecage	NA	Theta	WPLI	-0.22712
435	4973	Het	Homecage	NA	Theta	WPLI	0.39505999999999997
436	858	Het	Homecage	NA	Theta	WPLI	-0.12162
437	4638	Het	Homecage	NA	Theta	WPLI	0.11853
438	4237	Het	Homecage	NA	Beta	WPLI	0.27566
439	4580	Het	Homecage	NA	Beta	WPLI	0.12891
440	4968	Het	Homecage	NA	Beta	WPLI	-0.5358
441	4973	Het	Homecage	NA	Beta	WPLI	0.18635
442	858	Het	Homecage	NA	Beta	WPLI	-0.1262
443	4638	Het	Homecage	NA	Beta	WPLI	-0.074827
444	4237	Het	Homecage	NA	Low Gamma	WPLI	0.019847
445	4580	Het	Homecage	NA	Low Gamma	WPLI	-0.12854000000000002
446	4968	Het	Homecage	NA	Low Gamma	WPLI	-0.62831
447	4973	Het	Homecage	NA	Low Gamma	WPLI	0.008721099999999999
448	858	Het	Homecage	NA	Low Gamma	WPLI	0.11915
449	4638	Het	Homecage	NA	Low Gamma	WPLI	-0.19197999999999998
450	4237	Het	Homecage	NA	High Gamma	WPLI	0.013595
451	4580	Het	Homecage	NA	High Gamma	WPLI	-0.010606
452	4968	Het	Homecage	NA	High Gamma	WPLI	-0.772
453	4973	Het	Homecage	NA	High Gamma	WPLI	-0.035794
454	858	Het	Homecage	NA	High Gamma	WPLI	-0.045538
455	4638	Het	Homecage	NA	High Gamma	WPLI	-0.147
