# Supplementary material for: Altered hippocampal-prefrontal communication during anxiety-related avoidance in mice deficient for the autism-associated gene Pogz
Source: eLife. 2020 Nov 6;9:e54835. doi: 10.7554/eLife.54835 (PMC7682992; doi:10.7554/eLife.54835)
Supplement: Figure 4—source data 1. [file elife-54835-fig4-data1.csv]

	Animal	Genotype	File	Recording	Measure	Value	Cell Type
0	19722	WT	19722017	VC	Paired Pulse Ratio	0.6612910732791039	FS
1	19722	WT	19722031	VC	Paired Pulse Ratio	0.9707711836488848	FS
2	19722	WT	19722044	VC	Paired Pulse Ratio	0.9393568873296456	FS
3	19404	WT	19404008	VC	Paired Pulse Ratio	0.9633592644238544	FS
4	19412	Het	19412021	VC	Paired Pulse Ratio	0.455845411285339	FS
5	19412	Het	19412034	VC	Paired Pulse Ratio	0.5977295572626659	FS
6	19412	Het	19412061	VC	Paired Pulse Ratio	0.3193054523010729	FS
7	191007	Het	191007017	VC	Paired Pulse Ratio	0.6939219859548507	FS
8	19927	WT	19927022	VC	Paired Pulse Ratio	0.6481442545181165	FS
9	19927	WT	19927036	VC	Paired Pulse Ratio	0.6116769065657149	FS
10	19927	WT	19927049	VC	Paired Pulse Ratio	0.5521670160907305	FS
11	19927	WT	19927105	VC	Paired Pulse Ratio	0.5775592987525284	FS
12	19716	WT	19716008	VC	Paired Pulse Ratio	0.7462608923539429	FS
13	19720	WT	19720022	VC	Paired Pulse Ratio	0.7196992642520282	FS
14	19912	Het	19912008	VC	Paired Pulse Ratio	0.6590332151344296	FS
15	19912	Het	19912024	VC	Paired Pulse Ratio	0.3097943895460764	FS
16	19912	Het	19912055	VC	Paired Pulse Ratio	0.3194505625885949	FS
17	18605	WT	18605028	VC	Paired Pulse Ratio	0.4297354520553983	FS
18	19722	WT	19722017	VC	Total Charge	518.863315567098	FS
19	19722	WT	19722031	VC	Total Charge	803.2960051926033	FS
20	19722	WT	19722044	VC	Total Charge	887.5513447768914	FS
21	19404	WT	19404008	VC	Total Charge	569.9402397739715	FS
22	19412	Het	19412021	VC	Total Charge	92.85453881151855	FS
23	19412	Het	19412034	VC	Total Charge	86.58287549981695	FS
24	19412	Het	19412061	VC	Total Charge	32.58900622343524	FS
25	191007	Het	191007017	VC	Total Charge	220.85667793153272	FS
26	19927	WT	19927022	VC	Total Charge	487.91391050550544	FS
27	19927	WT	19927036	VC	Total Charge	203.32367814349317	FS
28	19927	WT	19927049	VC	Total Charge	40.85546891582562	FS
29	19927	WT	19927105	VC	Total Charge	113.10354239659536	FS
30	19716	WT	19716008	VC	Total Charge	458.9625881494503	FS
31	19720	WT	19720022	VC	Total Charge	50.435961369442026	FS
32	19912	Het	19912008	VC	Total Charge	387.35353583150606	FS
33	19912	Het	19912024	VC	Total Charge	19.832638070002915	FS
34	19912	Het	19912055	VC	Total Charge	36.61944424681435	FS
35	18605	WT	18605028	VC	Total Charge	111.18673403369073	FS
36	19722	WT	19722013	CC	First Spike Latency	3.8149999999999986	FS
37	19722	WT	19722027	CC	First Spike Latency	3.8175000000000017	FS
38	19722	WT	19722040	CC	First Spike Latency	3.65375	FS
39	19404	WT	19404004	CC	First Spike Latency	3.6406250000000013	FS
40	19412	Het	19412017	CC	First Spike Latency	10.218000000000002	FS
41	19412	Het	19412030	CC	First Spike Latency	11.320408163265308	FS
42	19412	Het	19412057	CC	First Spike Latency		FS
43	191007	Het	191007013	CC	First Spike Latency	10.182	FS
44	19927	WT	19927018	CC	First Spike Latency	4.44875	FS
45	19927	WT	19927032	CC	First Spike Latency	6.138405797101452	FS
46	19927	WT	19927045	CC	First Spike Latency	6.3	FS
47	19927	WT	19927101	CC	First Spike Latency	6.026666666666666	FS
48	19716	WT	19716004	CC	First Spike Latency	4.424375000000001	FS
49	19720	WT	19720018	CC	First Spike Latency		FS
50	19912	Het	19912004	CC	First Spike Latency	8.531875	FS
51	19912	Het	19912020	CC	First Spike Latency	5.008333333333333	FS
52	19912	Het	19912051	CC	First Spike Latency		FS
53	18605	WT	18605027	CC	First Spike Latency	10.2	FS
54	19722	WT	19722013	CC	Evoked Spikes	46.8	FS
55	19722	WT	19722027	CC	Evoked Spikes	296.2	FS
56	19722	WT	19722040	CC	Evoked Spikes	218.8	FS
57	19404	WT	19404004	CC	Evoked Spikes	192.4	FS
58	19412	Het	19412017	CC	Evoked Spikes	5.4	FS
59	19412	Het	19412030	CC	Evoked Spikes	9.8	FS
60	19412	Het	19412057	CC	Evoked Spikes	0.0	FS
61	191007	Het	191007013	CC	Evoked Spikes	15.0	FS
62	19927	WT	19927018	CC	Evoked Spikes	73.6	FS
63	19927	WT	19927032	CC	Evoked Spikes	13.8	FS
64	19927	WT	19927045	CC	Evoked Spikes	0.2	FS
65	19927	WT	19927101	CC	Evoked Spikes	15.4	FS
66	19716	WT	19716004	CC	Evoked Spikes	33.4	FS
67	19720	WT	19720018	CC	Evoked Spikes	0.0	FS
68	19912	Het	19912004	CC	Evoked Spikes	24.6	FS
69	19912	Het	19912020	CC	Evoked Spikes	1.2	FS
70	19912	Het	19912051	CC	Evoked Spikes	0.0	FS
71	18605	WT	18605027	CC	Evoked Spikes	1.0	FS
