# Supplementary material for: Altered hippocampal-prefrontal communication during anxiety-related avoidance in mice deficient for the autism-associated gene Pogz
Source: eLife. 2020 Nov 6;9:e54835. doi: 10.7554/eLife.54835 (PMC7682992; doi:10.7554/eLife.54835)
Supplement: Figure 5—source data 1. [file elife-54835-fig5-data1.csv]

	Animal	Genotype	File	Recording	Measure	Value	Cell Type
0	19830	WT	19830010	VC	Paired Pulse Ratio	0.4879679958495425	Pyramidal
1	18828	WT	18828026	VC	Paired Pulse Ratio	0.9284273259658812	Pyramidal
2	18821	WT	18821013	VC	Paired Pulse Ratio	0.7226198370525116	Pyramidal
3	18821	WT	18821031	VC	Paired Pulse Ratio	0.588931949535225	Pyramidal
4	18818	WT	18818065	VC	Paired Pulse Ratio	0.8133872270098752	Pyramidal
5	18819	Het	18819022	VC	Paired Pulse Ratio	0.5974122771075949	Pyramidal
6	19906	Het	19906013	VC	Paired Pulse Ratio	0.4738180087869762	Pyramidal
7	19403	Het	19403008	VC	Paired Pulse Ratio	0.6794961342596295	Pyramidal
8	19403	Het	19403033	VC	Paired Pulse Ratio	0.6766963012977859	Pyramidal
9	19403	Het	19403046	VC	Paired Pulse Ratio	0.6086739055029338	Pyramidal
10	19403	Het	19403059	VC	Paired Pulse Ratio	0.4419873990588078	Pyramidal
11	19409	Het	19409014	VC	Paired Pulse Ratio	0.6892131777031903	Pyramidal
12	19412	Het	19412009	VC	Paired Pulse Ratio	0.6676849434656018	Pyramidal
13	19411	WT	19411009	VC	Paired Pulse Ratio	0.7636058038396666	Pyramidal
14	19411	WT	19411021	VC	Paired Pulse Ratio	0.7610771048761265	Pyramidal
15	19411	WT	19411035	VC	Paired Pulse Ratio	0.7469091661825982	Pyramidal
16	19408	WT	19408019	VC	Paired Pulse Ratio	0.8872446345080874	Pyramidal
17	18608	Het	18608006	VC	Paired Pulse Ratio	0.5556374452222735	Pyramidal
18	19720	WT	19720008	VC	Paired Pulse Ratio	0.6924621046820594	Pyramidal
19	19701	WT	19701008	VC	Paired Pulse Ratio	0.5489371008168095	Pyramidal
20	181127	Het	181127036	VC	Paired Pulse Ratio	0.5630413832169978	Pyramidal
21	181129	Het	181129015	VC	Paired Pulse Ratio	0.6276067096642275	Pyramidal
22	18605	WT	18605005	VC	Paired Pulse Ratio	0.6415616897045388	Pyramidal
23	18605	WT	18605016	VC	Paired Pulse Ratio	0.4091405091725401	Pyramidal
24	18605	WT	18605052	VC	Paired Pulse Ratio	0.5616342195072489	Pyramidal
25	18605	WT	18605072	VC	Paired Pulse Ratio	0.603477263755325	Pyramidal
26	18604	WT	18604075	VC	Paired Pulse Ratio	0.7087127609731348	Pyramidal
27	19902	WT	19902015	VC	Paired Pulse Ratio	0.5299480587779163	Pyramidal
28	19830	WT	19830010	VC	Total Charge	46.33931284855687	Pyramidal
29	18828	WT	18828026	VC	Total Charge	283.17847125446787	Pyramidal
30	18821	WT	18821013	VC	Total Charge	355.7858925190738	Pyramidal
31	18821	WT	18821031	VC	Total Charge	203.5534049498835	Pyramidal
32	18818	WT	18818065	VC	Total Charge	182.16672390674458	Pyramidal
33	18819	Het	18819022	VC	Total Charge	48.67133452708358	Pyramidal
34	19906	Het	19906013	VC	Total Charge	142.03508606853555	Pyramidal
35	19403	Het	19403008	VC	Total Charge	40.06316761867653	Pyramidal
36	19403	Het	19403033	VC	Total Charge	255.8892633829076	Pyramidal
37	19403	Het	19403046	VC	Total Charge	358.58891295892477	Pyramidal
38	19403	Het	19403059	VC	Total Charge	90.66535906402149	Pyramidal
39	19409	Het	19409014	VC	Total Charge	343.316104298897	Pyramidal
40	19412	Het	19412009	VC	Total Charge	238.7218557617934	Pyramidal
41	19411	WT	19411009	VC	Total Charge	328.3291801459138	Pyramidal
42	19411	WT	19411021	VC	Total Charge	537.9495548563762	Pyramidal
43	19411	WT	19411035	VC	Total Charge	222.686702501769	Pyramidal
44	19408	WT	19408019	VC	Total Charge	218.34438050056875	Pyramidal
45	18608	Het	18608006	VC	Total Charge	83.12888910273597	Pyramidal
46	19720	WT	19720008	VC	Total Charge	170.34550483638358	Pyramidal
47	19701	WT	19701008	VC	Total Charge	36.344827986231934	Pyramidal
48	181127	Het	181127036	VC	Total Charge	280.4368660600156	Pyramidal
49	181129	Het	181129015	VC	Total Charge	205.3677810398025	Pyramidal
50	18605	WT	18605005	VC	Total Charge	177.42440553186142	Pyramidal
51	18605	WT	18605016	VC	Total Charge	59.74049350202782	Pyramidal
52	18605	WT	18605052	VC	Total Charge	97.37387280767727	Pyramidal
53	18605	WT	18605072	VC	Total Charge	61.49267042871621	Pyramidal
54	18604	WT	18604075	VC	Total Charge	272.89320263788534	Pyramidal
55	19902	WT	19902015	VC	Total Charge	18.31080833319433	Pyramidal
56	19830	WT	19830006	CC	First Spike Latency	9.519607843137253	Pyramidal
57	18828	WT	18828020	CC	First Spike Latency	6.513749999999999	Pyramidal
58	18821	WT	18821004	CC	First Spike Latency	6.590000000000002	Pyramidal
59	18821	WT	18821022	CC	First Spike Latency	7.202666666666667	Pyramidal
60	18818	WT	18818056	CC	First Spike Latency	8.483928571428569	Pyramidal
61	18819	Het	18819008	CC	First Spike Latency	6.366666666666667	Pyramidal
62	19906	Het	19906009	CC	First Spike Latency	8.091525423728813	Pyramidal
63	19403	Het	19403002	CC	First Spike Latency		Pyramidal
64	19403	Het	19403029	CC	First Spike Latency	9.710000000000004	Pyramidal
65	19403	Het	19403042	CC	First Spike Latency	7.352500000000001	Pyramidal
66	19403	Het	19403055	CC	First Spike Latency	9.091666666666667	Pyramidal
67	19409	Het	19409010	CC	First Spike Latency	12.761818181818182	Pyramidal
68	19412	Het	19412004	CC	First Spike Latency	6.664583333333335	Pyramidal
69	19411	WT	19411005	CC	First Spike Latency	6.156250000000001	Pyramidal
70	19411	WT	19411017	CC	First Spike Latency	9.001999999999997	Pyramidal
71	19411	WT	19411031	CC	First Spike Latency	6.4642857142857135	Pyramidal
72	19408	WT	19408015	CC	First Spike Latency	5.663291139240504	Pyramidal
73	18608	Het	18608003	CC	First Spike Latency	10.078571428571431	Pyramidal
74	19720	WT	19720004	CC	First Spike Latency	10.586875	Pyramidal
75	19701	WT	19701004	CC	First Spike Latency		Pyramidal
76	181127	Het	181127032	CC	First Spike Latency	7.480624999999999	Pyramidal
77	181129	Het	181129007	CC	First Spike Latency	10.325471698113203	Pyramidal
78	18605	WT	18605002	CC	First Spike Latency	8.0275	Pyramidal
79	18605	WT	18605013	CC	First Spike Latency		Pyramidal
80	18605	WT	18605049	CC	First Spike Latency		Pyramidal
81	18605	WT	18605069	CC	First Spike Latency		Pyramidal
82	18604	WT	18604072	CC	First Spike Latency	7.0500000000000025	Pyramidal
83	19902	WT	19902011	CC	First Spike Latency		Pyramidal
84	19830	WT	19830006	CC	Evoked Spikes	10.8	Pyramidal
85	18828	WT	18828020	CC	Evoked Spikes	16.2	Pyramidal
86	18821	WT	18821004	CC	Evoked Spikes	17.4	Pyramidal
87	18821	WT	18821022	CC	Evoked Spikes	21.8	Pyramidal
88	18818	WT	18818056	CC	Evoked Spikes	5.6	Pyramidal
89	18819	Het	18819008	CC	Evoked Spikes	0.6	Pyramidal
90	19906	Het	19906009	CC	Evoked Spikes	11.8	Pyramidal
91	19403	Het	19403002	CC	Evoked Spikes	0.0	Pyramidal
92	19403	Het	19403029	CC	Evoked Spikes	10.0	Pyramidal
93	19403	Het	19403042	CC	Evoked Spikes	17.0	Pyramidal
94	19403	Het	19403055	CC	Evoked Spikes	2.4	Pyramidal
95	19409	Het	19409010	CC	Evoked Spikes	11.4	Pyramidal
96	19412	Het	19412004	CC	Evoked Spikes	15.4	Pyramidal
97	19411	WT	19411005	CC	Evoked Spikes	17.4	Pyramidal
98	19411	WT	19411017	CC	Evoked Spikes	15.0	Pyramidal
99	19411	WT	19411031	CC	Evoked Spikes	4.2	Pyramidal
100	19408	WT	19408015	CC	Evoked Spikes	16.2	Pyramidal
101	18608	Het	18608003	CC	Evoked Spikes	11.8	Pyramidal
102	19720	WT	19720004	CC	Evoked Spikes	19.4	Pyramidal
103	19701	WT	19701004	CC	Evoked Spikes	0.0	Pyramidal
104	181127	Het	181127032	CC	Evoked Spikes	16.0	Pyramidal
105	181129	Het	181129007	CC	Evoked Spikes	10.6	Pyramidal
106	18605	WT	18605002	CC	Evoked Spikes	17.0	Pyramidal
107	18605	WT	18605013	CC	Evoked Spikes	0.0	Pyramidal
108	18605	WT	18605049	CC	Evoked Spikes	0.0	Pyramidal
109	18605	WT	18605069	CC	Evoked Spikes	0.0	Pyramidal
110	18604	WT	18604072	CC	Evoked Spikes	10.0	Pyramidal
111	19902	WT	19902011	CC	Evoked Spikes	0.0	Pyramidal
