# Supplementary material for: Altered hippocampal-prefrontal communication during anxiety-related avoidance in mice deficient for the autism-associated gene Pogz
Source: eLife journal article supplement (doi:10.7554/elife.54835), 2020-11-06

A

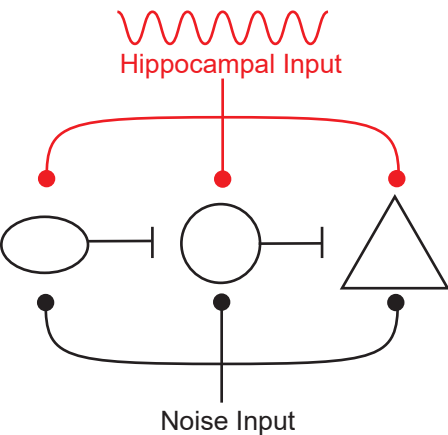

B

Pyramidal Correlation with Input

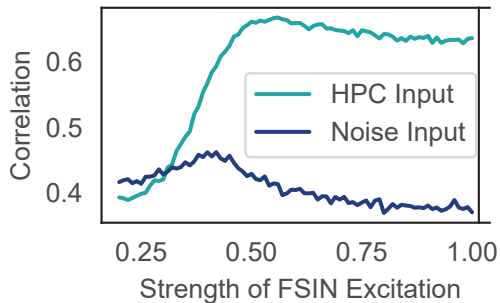

C

Cell Type Firing Rate

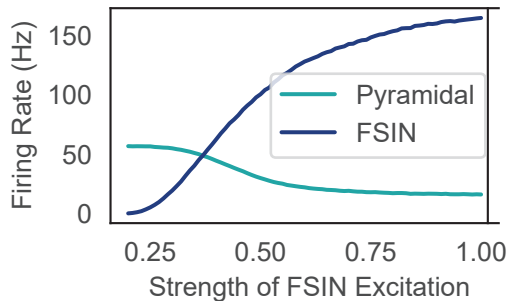

D

HPC Correlation:Noise Correlation Ratio

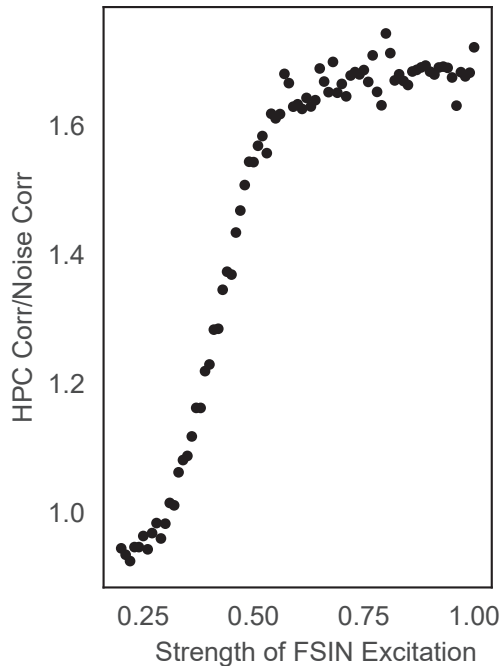

Supplement: supp [file elife_poa_e54835_Figure_6_figure_supplement_1.pdf › elife_poa_e54835_Figure_6_figure_supplement_1.pdf]
