# Supplementary material for: Altered hippocampal-prefrontal communication during anxiety-related avoidance in mice deficient for the autism-associated gene Pogz
Source: eLife journal article supplement (doi:10.7554/elife.54835), 2020-11-06

A Pyr Correlation with 0.5Hz Input

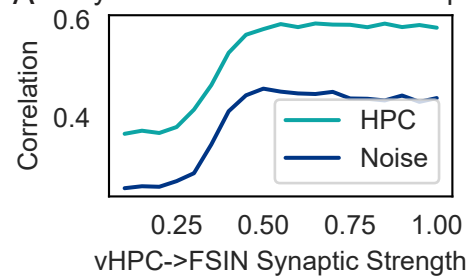

C Pyr Correlation with 2Hz Input

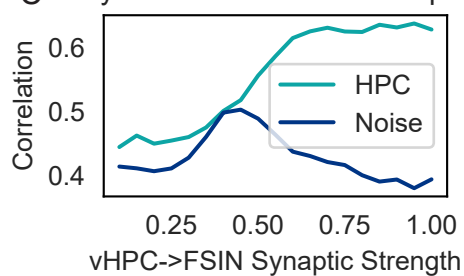

E Pyr Correlation with 8Hz Input

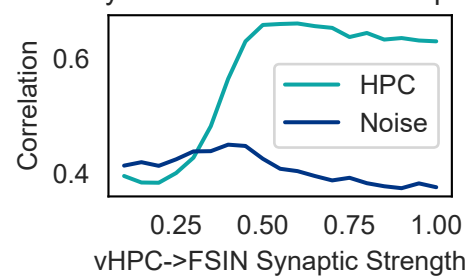

G Pyr Correlation with 40Hz Input

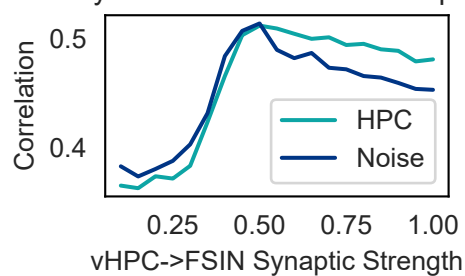

B HPC:Noise Correlation Ratio

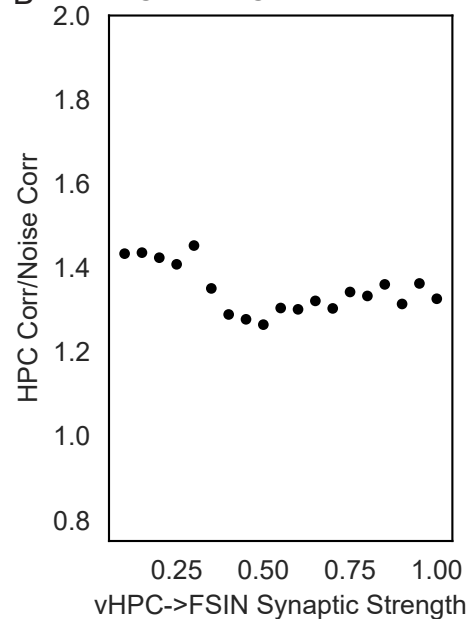

D HPC:Noise Correlation Ratio

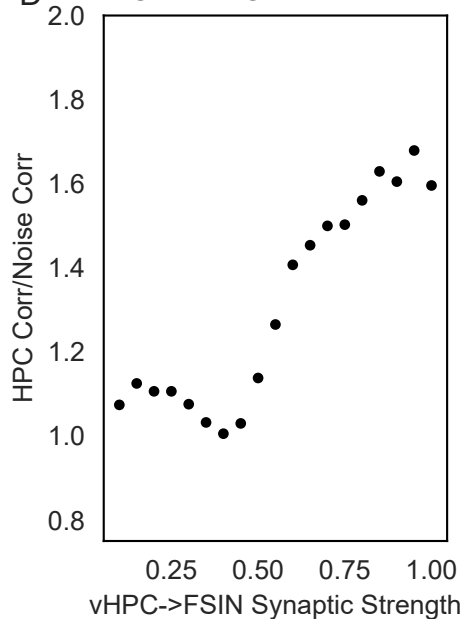

F HPC:Noise Correlation Ratio

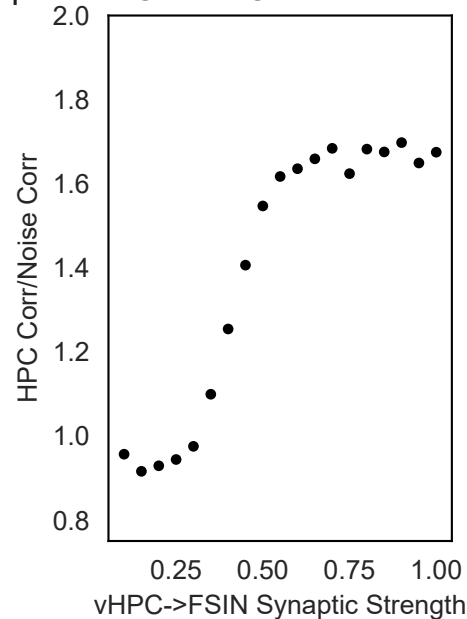

H HPC:Noise Correlation Ratio

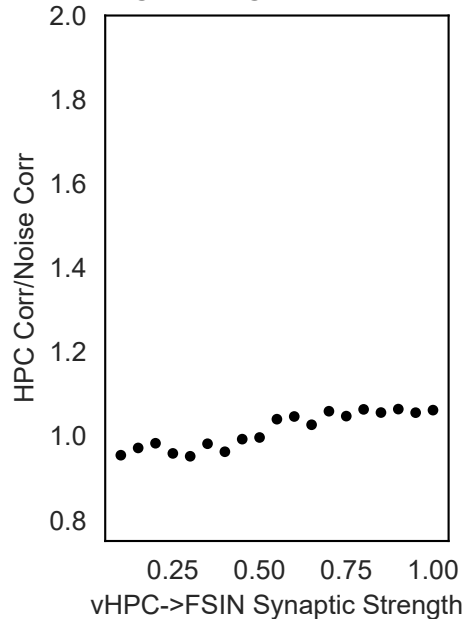

Supplement: supp [file elife_poa_e54835_Figure_6_figure_supplement_2.pdf › elife_poa_e54835_Figure_6_figure_supplement_2.pdf]
