# Supplementary figures and images for: Altered hippocampal-prefrontal communication during anxiety-related avoidance in mice deficient for the autism-associated gene Pogz
Source: eLife journal article supplement (doi:10.7554/elife.54835), 2020-11-06

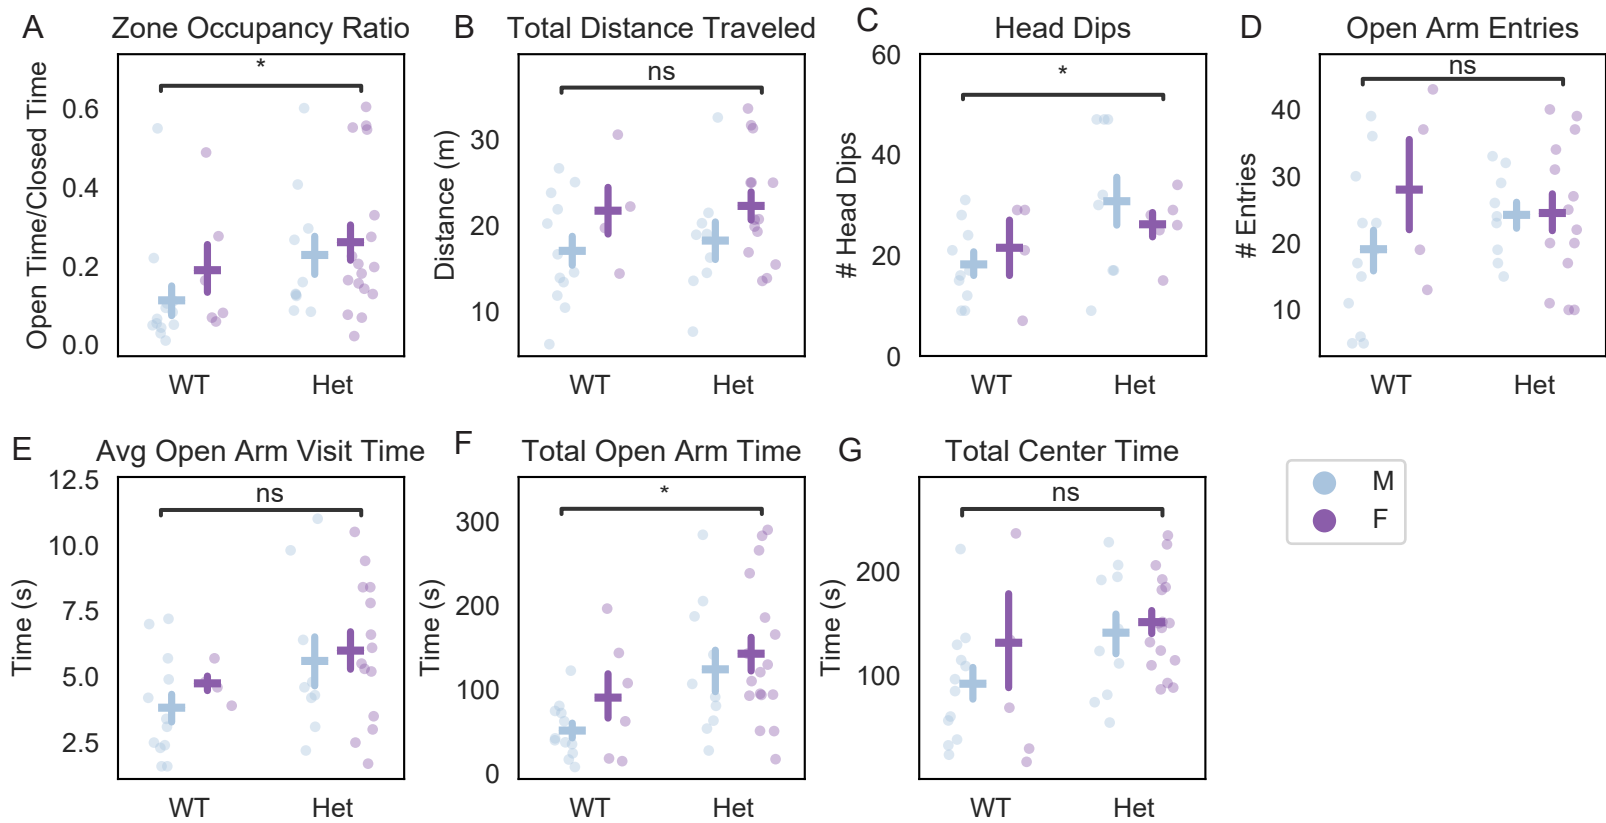

Supplement: supp [file elife_poa_e54835_Figure_1_figure_supplement_1.pdf › elife_poa_e54835_Figure_1_figure_supplement_1.pdf]

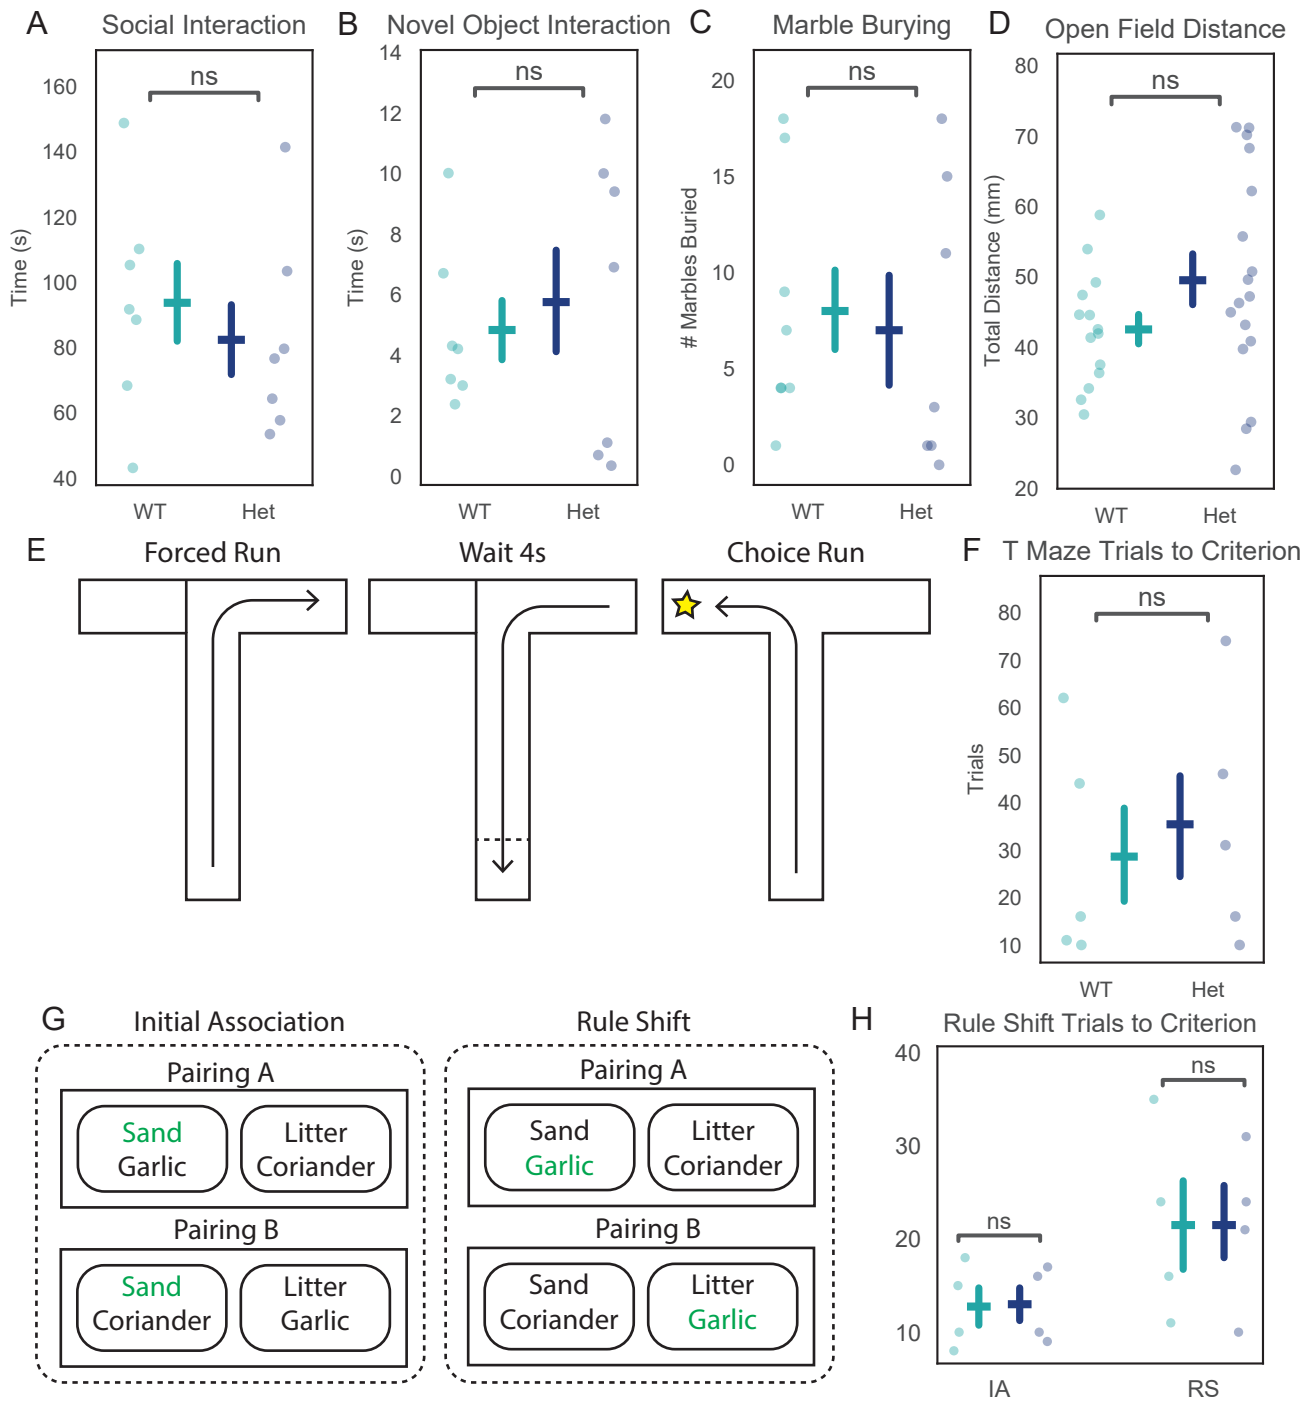

Supplement: supp [file elife_poa_e54835_Figure_1_figure_supplement_2.pdf › elife_poa_e54835_Figure_1_figure_supplement_2.pdf]

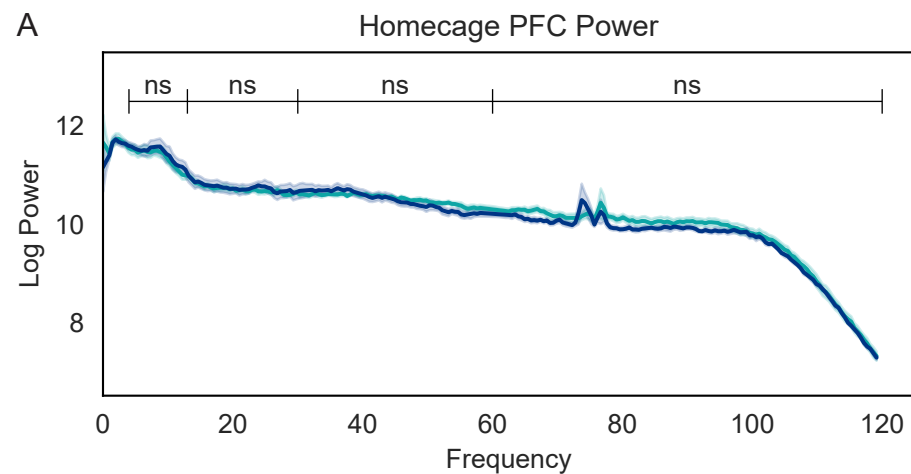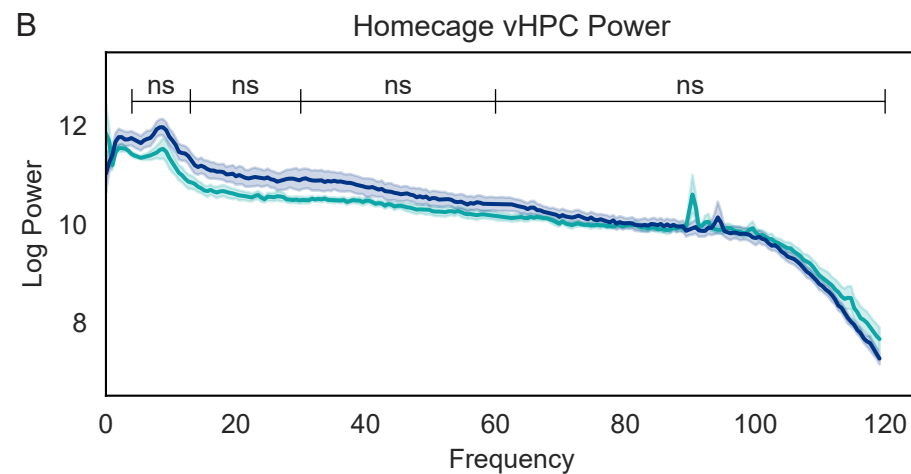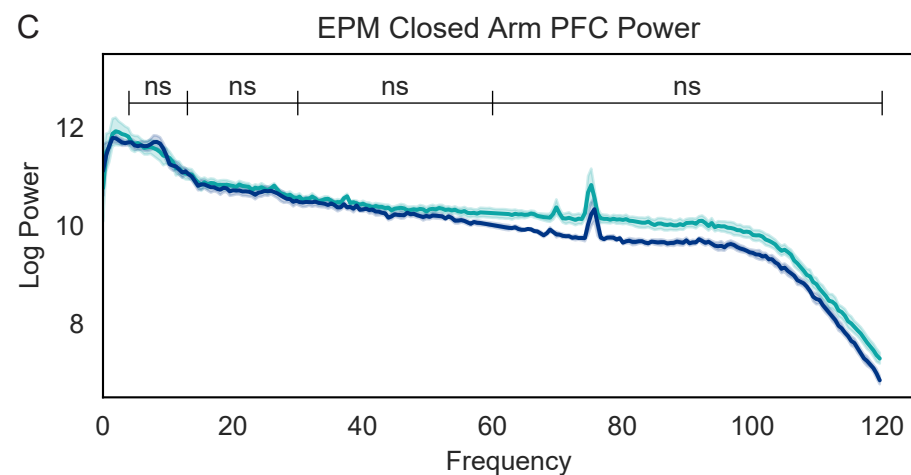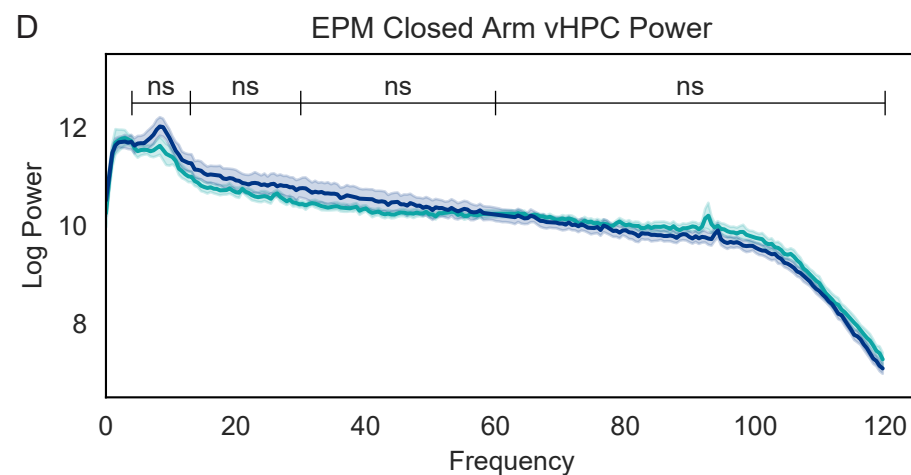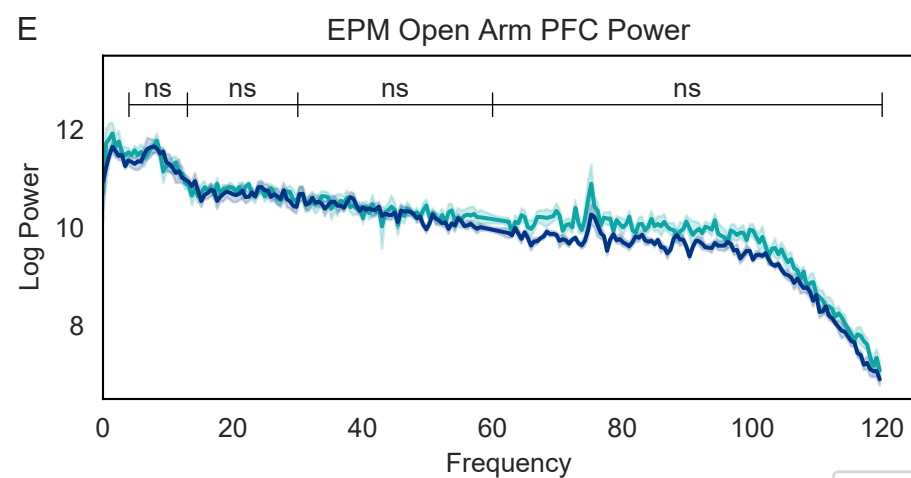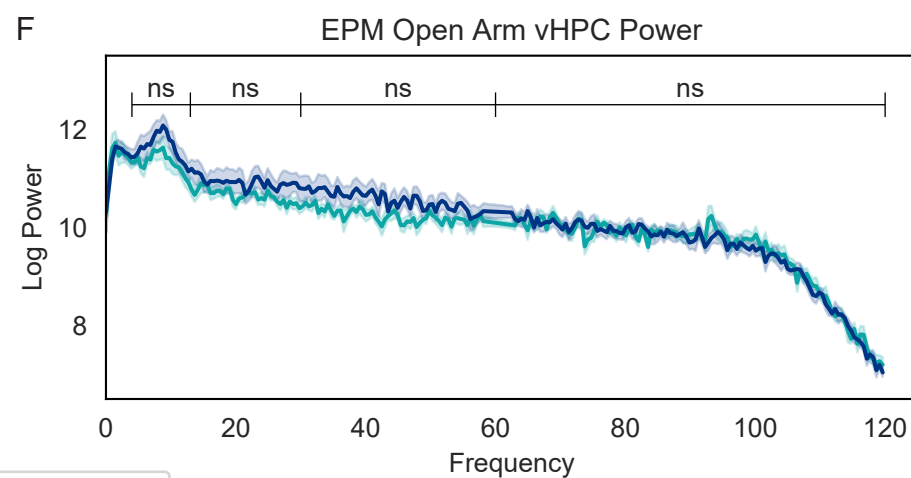

— WT — Het

Supplement: supp [file elife_poa_e54835_Figure_2_figure_supplement_1.pdf › elife_poa_e54835_Figure_2_figure_supplement_1.pdf]

A

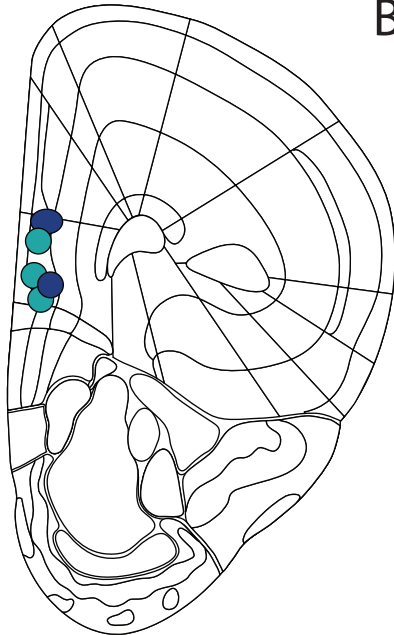

B

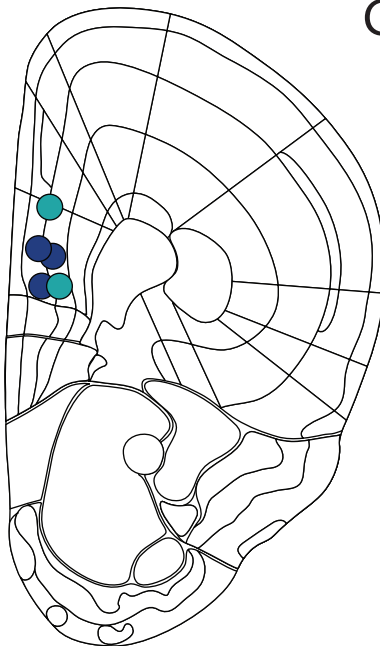

C

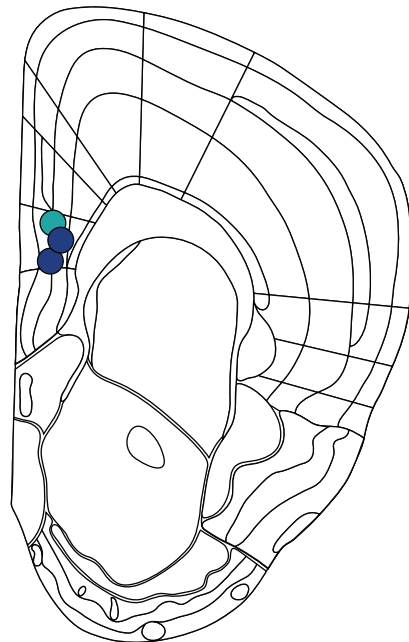

D

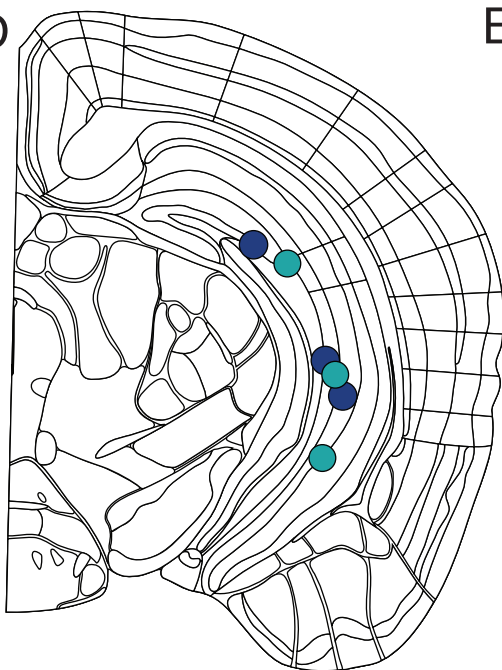

E

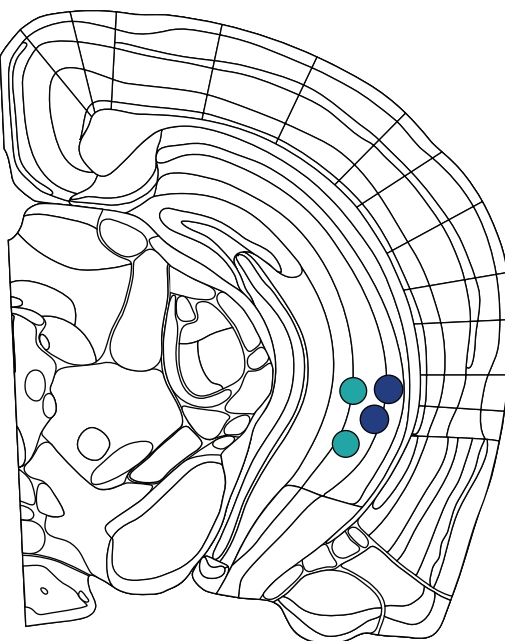

F

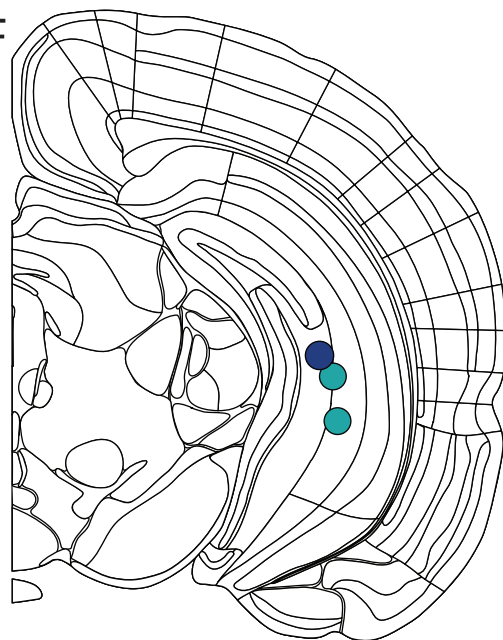

● Wildtype ● Heterozygote

Supplement: supp [file elife_poa_e54835_Figure_2_figure_supplement_2.pdf › elife_poa_e54835_Figure_2_figure_supplement_2.pdf]

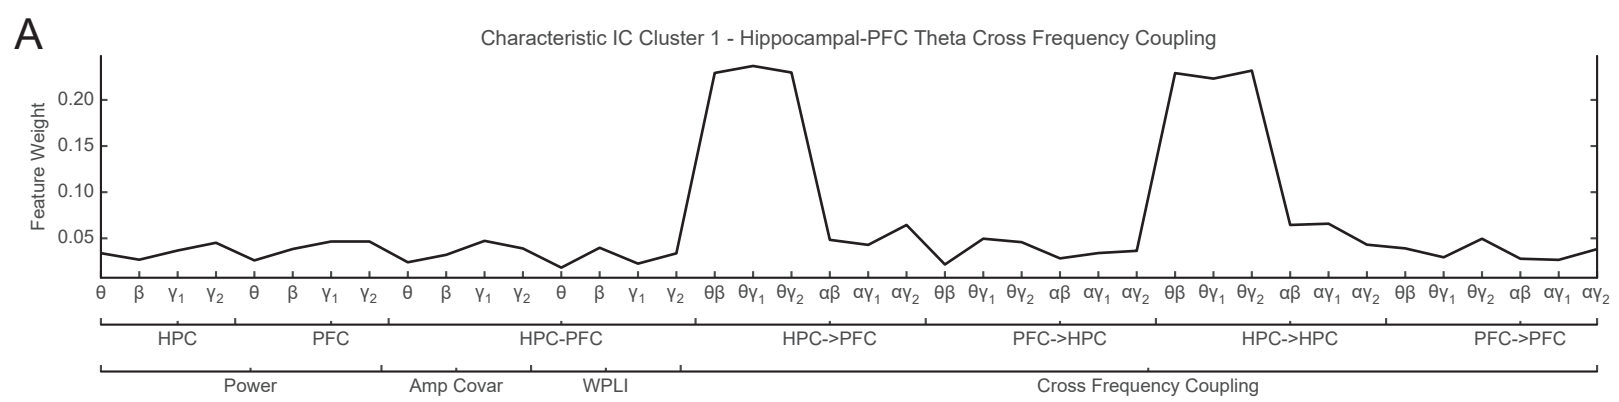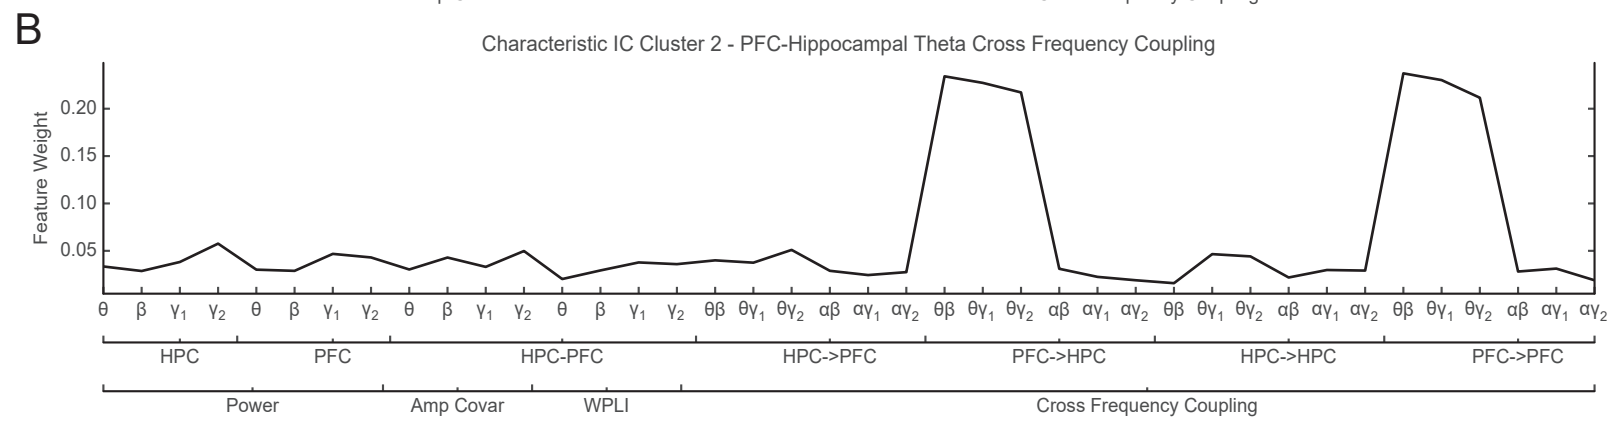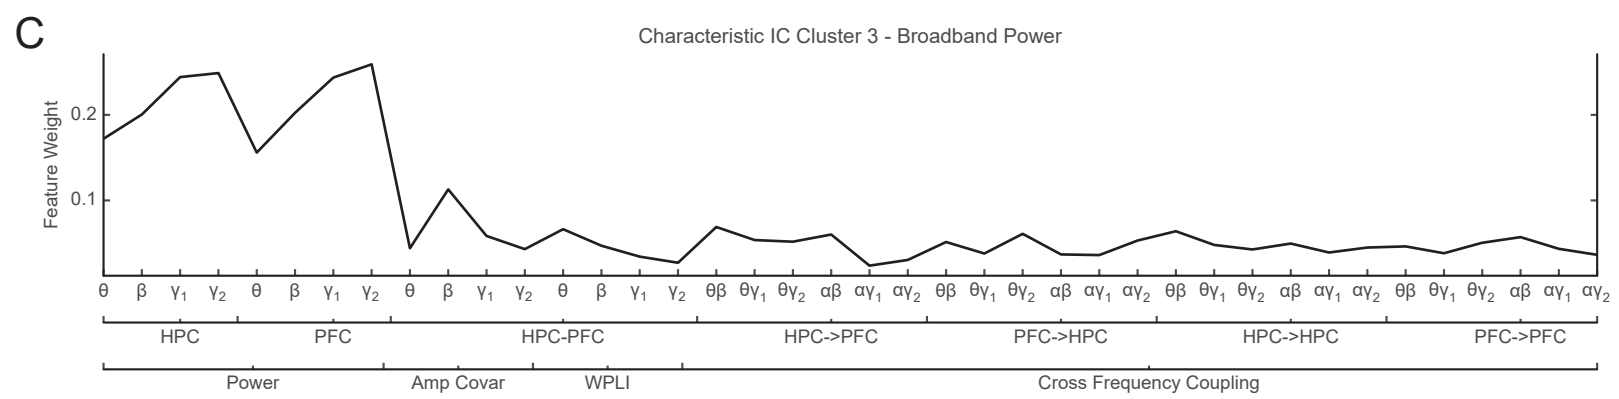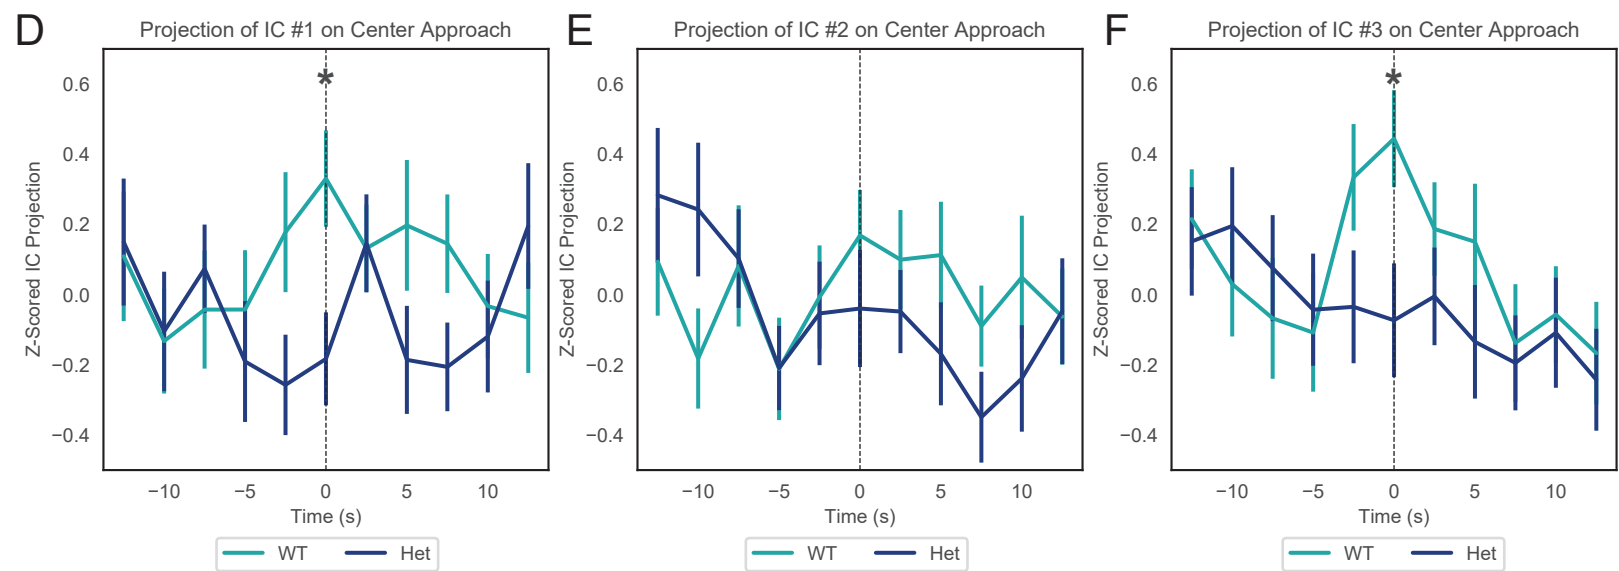

Supplement: supp [file elife_poa_e54835_Figure_3_figure_supplement_1.pdf › elife_poa_e54835_Figure_3_figure_supplement_1.pdf]

### A Wildtype Fast-Spiking Interneuron

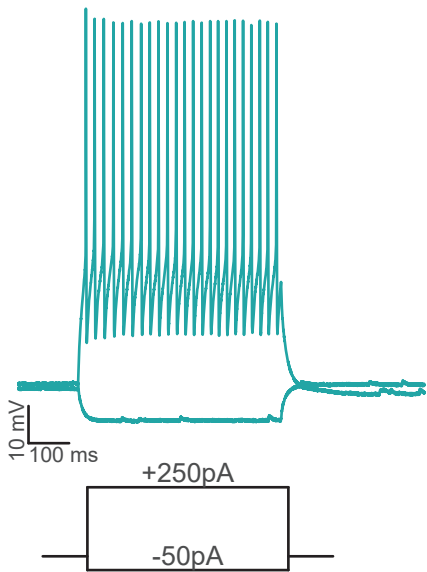

## B Het Fast-Spiking Interneuron

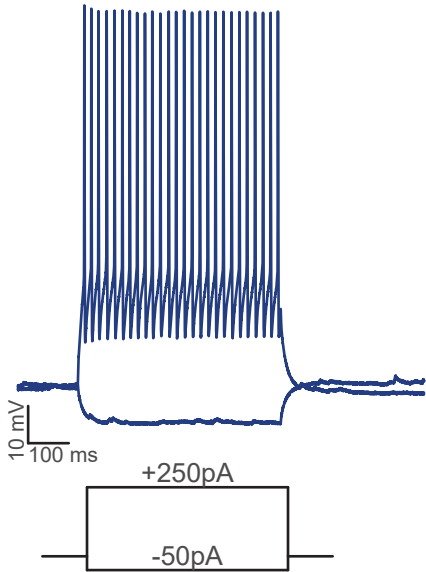

C

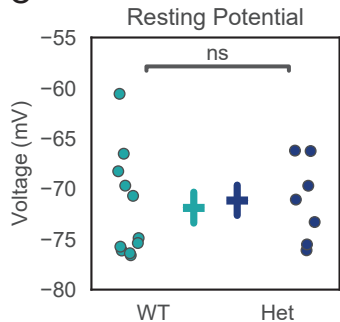

D

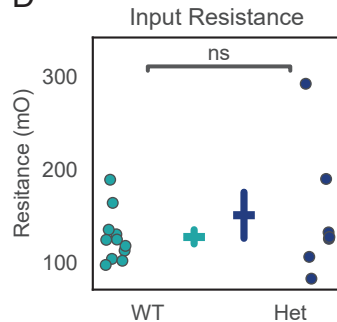

E

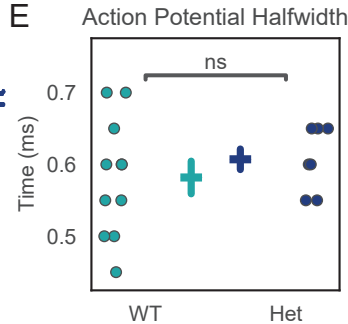

F

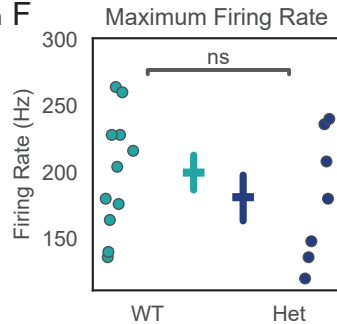

Supplement: supp [file elife_poa_e54835_Figure_4_figure_supplement_1.pdf › elife_poa_e54835_Figure_4_figure_supplement_1.pdf]

**A** Wildtype Pyramidal Cell

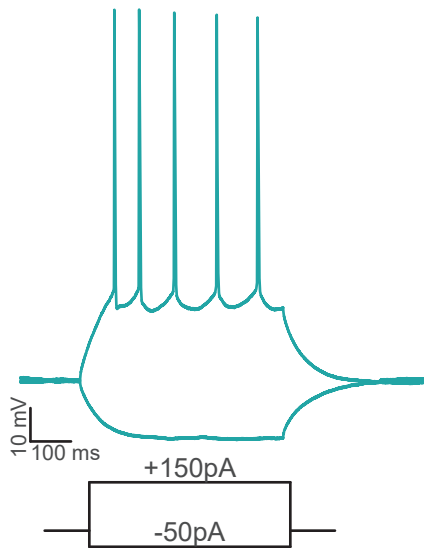

**B** Het Pyramidal Cell

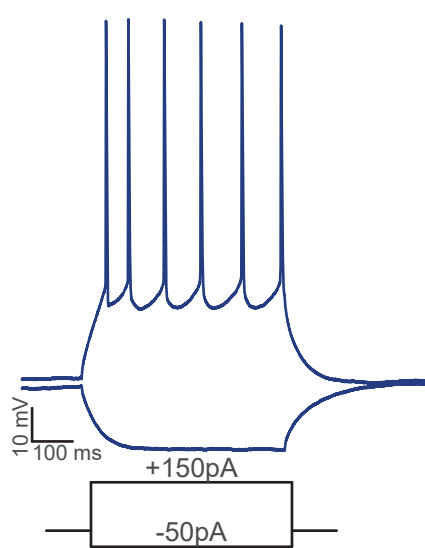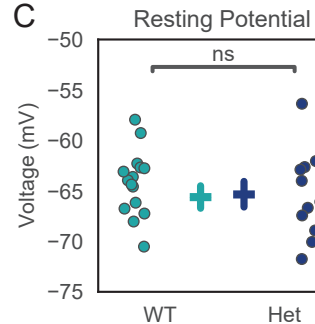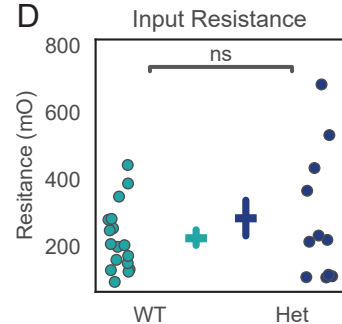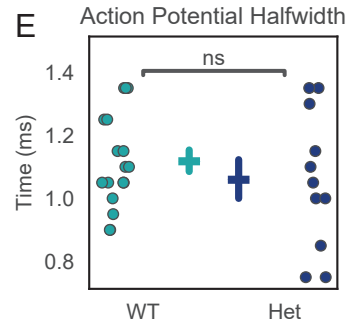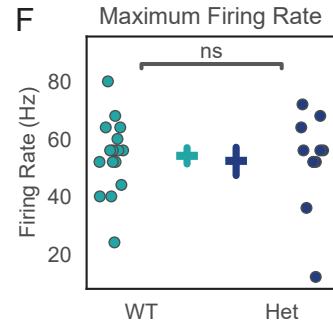

Supplement: supp [file elife_poa_e54835_Figure_5_figure_supplement_1.pdf › elife_poa_e54835_Figure_5_figure_supplement_1.pdf]
